# Origins of pandemic clones from environmental gene pools

B. Jesse Shapiro<sup>1</sup>, Inès Levade<sup>1#</sup>, Gabriela Kovacikova<sup>2#</sup>, Ronald K. Taylor<sup>2</sup>, Salvador Almagro-Moreno<sup>2,3\*</sup>

<sup>1</sup>Department of Biological Sciences, University of Montreal, Montreal, Quebec, Canada.

<sup>2</sup>Department of Microbiology and Immunology, Geisel School of Medicine at Dartmouth, Hanover, New Hampshire, USA. <sup>3</sup>Burnett School of Biomedical Sciences, College of Medicine, University of Central Florida, Orlando, Florida, USA.

\*For correspondence: samoreno@ucf.edu

#These authors contributed equally

**Abbreviations:** PG, Pandemic genome; EG, Environmental genome; SNP, Single nucleotide polymorphism; VAP, Virulence adaptive polymorphism; NS, Nonsynonymous; S, Synonymous.

# **Abstract**

Some microbes can transition from an environmental lifestyle to a pathogenic one<sup>1-4</sup>. This ecological switch typically occurs through the acquisition of horizontally acquired virulence genes<sup>5-8</sup>. However, the genomic features that must be present in a population prior to the acquisition of virulence genes and emergence of pathogenic clones remain unknown. We hypothesized that virulence adaptive polymorphisms (VAPs) circulate in environmental populations and are required for this transition. We developed a comparative genomic framework for identifying VAPs, using *Vibrio cholerae* as a model. We then characterized several environmental VAP alleles to show that, while some of them reduced the ability of clinical strains to colonize a mammalian host, other alleles conferred efficient host colonization. These results show that VAPs are present in environmental bacterial populations prior to the emergence of virulent clones. We propose a scenario in which VAPs circulate in the environment, they become selected and enriched under certain ecological conditions, and finally a genomic background containing several VAPs acquires virulence factors that allows for its emergence as a pathogenic clone.

# **Main text**

Numerous bacterial pathogens have emerged from environmental populations<sup>1-4,9</sup>. These virulent clones evolve through the acquisition of toxins and host colonization factors<sup>5-8</sup>. Given that the genes encoding these factors can often spread widely by horizontal gene transfer, it is surprising that only a limited number of pathogenic clones have emerged from any particular bacterial species. As a model of how environmental gene pools give rise to pandemic clones, we used *Vibrio cholerae*, a genetically diverse group of aquatic bacteria that include a confined phylogenetic group, the “pandemic genome” group (PG), that can cause the severe diarrheal disease cholera in humans<sup>10-14</sup>. Seven pandemics of cholera have been recorded to date, all caused by the PG group. The first six pandemics were caused by strains of the classical biotype<sup>12,13</sup>; the current and seventh pandemic is caused by strains of the El Tor biotype, and has spread across the globe in several waves of transmission<sup>15</sup>. Virulence in *V. cholerae* PG is mainly determined by two virulence factors: the cholera toxin (CT) and the toxin-coregulated pilus (TCP), which are encoded within horizontally acquired genetic elements, the CTXΦ phage and the Vibrio Pathogenicity Island-1 (VPI-1) respectively<sup>16-20</sup>. Both CTXΦ and VPI-1 are always found in the PG group, however, they are also encoded in some environmental populations of *V. cholerae*<sup>10,11,21-28</sup>. Furthermore, even though some non-PG strains can cause gastrointestinal infections, only strains from the PG clade have ever emerged as source of pandemic cholera<sup>12,13,29-31</sup>.

To investigate the evolutionary origins of pandemic clones of *V. cholerae* and the potential for their reemergence, we analyzed 43 *V. cholerae* genomes sequenced from clinical and environmental samples (Methods; Supplementary Table 1). These genomes span the known genetic diversity of *V. cholerae* (Supplementary Text), and were divided into a primary dataset of 22 genomes and a replication dataset of 22 genomes (Supplementary Table 2), with one reference genome in common, MJ-1236. In the primary dataset, we chose 7 PGs, including both classical and El Tor, to represent the genetic diversity of the pandemic group. We

compared these with 15 non-clinical environmental genomes (EGs): 10 EGs from worldwide samples to include global diversity, and five sympatric isolates from the Great Bay Estuary (GBE) in New Hampshire, USA, a region with no recent history of cholera outbreaks<sup>32</sup>.

Consistent with the results of previous studies<sup>10,15,32,33</sup>, PGs form a distinct monophyletic group compared to EGs, based on the aligned core genome (Fig. 1a). Other than the PG group, there is little phylogenetic structure and the tree is star-like, with a similar pattern being observed in both the primary and replication datasets (Supplementary Fig. 1). Reticulations in the phylogenetic network indicate recombination or homoplasies (repeated mutations in independent lineages at the same locus), consistent with a large, genetically diverse and recombining *V. cholerae* population<sup>33,34</sup> (Supplementary Fig. 1). Given such a recombining population with mobile virulence factors, it remains puzzling why the ability to cause pandemic cholera is limited to the PG group.

To find unique features of PGs that could explain their pandemic success, we first searched for genes present in PGs but absent in EGs. Although there are a few genes which appear to be universally present in PGs, including the major virulence gene clusters CTXΦ and VPI-1, none of these genes are unique to PGs as they are also present in some EGs (Supplementary Table 3). This observation is consistent with previous work showing that these virulence genes are rapidly gained and lost in both EGs and PGs<sup>10,33</sup>. Therefore, there appear to be no gene families whose presence can easily explain the origin of pandemic cholera, nor are there strong boundaries to gene transfer between PGs and EGs.

Given the lack of PG-specific genes, we hypothesized that the environmental ancestor of the PGs had a particular genomic background containing alleles of core genes – which we term virulence adaptive polymorphisms (VAPs) – that served as “preadaptations” and enhanced its potential to give rise to pandemic disease. We started our search for VAPs by identifying SNPs in the aligned core of the 22 primary dataset genomes with one allele uniquely present in all PGs and a different allele uniquely present in all EGs. We called this a “fixed” SNP pattern. We

identified 819 such fixed SNPs, which fall on the long branch separating PGs and EGs (Fig. 1a) and are distributed across the genome (Fig. 1b; Supplementary Fig. 3). Some fixed SNPs could have contributed to the evolution of the pandemic phenotype in PG (*i.e.* candidate VAPs, under selection for increased virulence or host colonization), while others could be selectively neutral hitchhikers on the PG genomic background. Using the McDonald-Kreitman test<sup>35</sup>, we found evidence for genome-wide positive selection during the divergence of PGs from EGs, due to an excess of nonsynonymous changes at fixed sites, in both primary and replication datasets (Supplementary Table 4). However, no individual gene showed evidence for selection after correcting for multiple tests (Methods), rendering it difficult to identify candidate VAPs using fixed SNPs. Nonetheless, fixed SNPs constitute only a modest fraction of possible SNP patterns (Supplementary Table 2), and VAPs could also exist at other SNP sites that might shed light in the evolutionary past of the ancestral PG.

We then searched for variations following what we termed a “mixed” SNP pattern, where PGs encode one fixed allele and EGs encode a “mix” of two alleles: one that is unique to EGs (as in our previous search) but also one that is fixed in PGs (Fig. 1c inset). We reasoned that the existence of PG-like alleles segregating in contemporary environmental populations of *V. cholerae* could be informative about: 1) pathogen emergence, because having an allele fixed in PG suggests that it could also have been present in the environmental ancestor of PG; and 2) the potential for pathogen reemergence, as PG-like alleles, and thus potential VAPs, are still circulating in the environmental gene pool. We identified 39,171 mixed SNPs in the primary dataset. Most genes contain few mixed SNPs (median of 3) but some genes contain dense clusters, resulting in a mean of 10.3 mixed SNPs per gene. The replication dataset contained greater genetic diversity, but showed the same pattern of a few genes containing many mixed SNPs (Supplementary Table 2). Clusters of genes containing many mixed SNPs are visible when plotted across the genome (Fig. 1c). Some of these clusters are known polymorphic regions of the genome, such as the loci encoding the O-antigen and the flagellum. Many of

these clusters could be mutation hotspots, containing SNPs not directly relevant to virulence adaptation. However, clusters of mixed SNPs do not visibly overlap with clusters of overall polymorphism (Fig. 1c), indicating that accumulation of mixed SNPs cannot be explained only by mutation hotspots.

To formally exclude mutation hotspots and focus on clusters of mixed SNPs shaped mainly by natural selection instead of mutation and drift, we considered only genes with an excess of nonsynonymous (NS) mixed SNPs relative to synonymous (S) mixed SNPs, which control for the baseline mutation rate. The mixed SNP pattern by definition groups PG-like EGs away from the other environmental strains and clusters them with the PGs. We reasoned that genes with an elevated NS:S ratio at mixed SNP sites were more likely to show phenotypic variations and have evolved under positive selection, possibly underlying preadaptations of the PG ancestor. Using a threshold of  $\geq 12$  NS mixed SNPs per gene, mixed NS:S > 1.78, and mixed  $dN/dS > 0.60$  (respectively two standard deviations above the genome-wide medians) we identified five genes as candidate VAPs in the primary dataset, three of which survived multiple hypothesis correction, and two of which (*ompU* and hypothetical gene VCD\_001600) were also found in the replication dataset (Table 1). In contrast to the star-like genome-wide phylogeny (Fig. 1a), each of these five gene trees support one or more EGs grouping with PGs (Fig. 1d and Supplementary Fig. 4). Three of the gene trees, including the lipid A core O-antigen ligase, support EGs LMA3894-4 and 12129 branching with PGs (Supplementary Table 1 and Supplementary Fig. 4), consistent with these strains being O1-like<sup>10,36</sup>. The O-antigen ligase gene was not identified as a VAP in the replication dataset, which is expected given the absence of O1-like EGs in that dataset<sup>33</sup>. Three additional VAPs – all hypothetical proteins – were identified in the replication dataset (Supplementary Table 5).

Among the candidate VAPs, the gene with the most significant excess of mixed nonsynonymous SNPs in both datasets is *ompU* (Table 1). OmpU is an outer membrane porin that has been shown to play numerous roles in the intestinal colonization of *V. cholerae*, making

it a compelling candidate for phenotypic characterization<sup>37-41</sup>. We observed that environmental strains RC385, GBE0658 and GBE0428 have PG-like *ompU* alleles: they cluster near PGs in the *ompU* gene tree, share an 11 amino acid N-terminus insertion with PGs (Supplementary Fig. 5), and differ by only 15 to 45 amino acids (Supplementary Table 6). In contrast, the environmental strain GBE1114 differs from PG by 80 amino acid changes in OmpU and branches distantly from PG (Fig. 1d). We hypothesized that the PG-like alleles present in environmental strains might confer properties conducive to virulence. To test this, we constructed three different mutant strains each encoding one of three environmental alleles of *ompU* (all from sympatric GBE strains) into the background of N16961, a clinical strain from the current pandemic (Fig. 2). OmpU was detected on a protein gel stained with Coomassie blue and through immunoblot in all the constructed strains, indicating that all the strains effectively produce the environmental versions of the protein (Fig. 2a and S6). The band size differences reflect the diversity in protein sizes among the three environmental OmpU variants (Supplementary Fig. 5 and Supplementary Table 5).

We performed three sets of experiments to compare the phenotypes conferred by EG and PG-like alleles of *ompU*. First, we determined the survival of these strains in the presence of 0.4% bile, as it has been previously shown that OmpU confers resistance to this antimicrobial compound<sup>39</sup>. The mutant strain encoding the *ompU* allele from the environmental strain GBE1114 (OmpU<sup>GBE1114</sup>) had diminished bile tolerance and its survival in the presence of bile is similar to that of a deletion mutant (Fig 2b). OmpU<sup>GBE0428</sup> showed a statistically significant decrease in survival in the presence of bile, closer to wild-type PG than to a deletion mutant (Fig. 2b). In contrast, OmpU<sup>GBE0658</sup> show similar survival in the presence of bile as a PG strain (Fig. 2b). These experiments indicate that some environmental alleles of *ompU* confer properties beneficial for virulence. Second, we tested the survival of the mutants in the presence of polymyxin B, as OmpU also confers resistance against this antibiotic<sup>37</sup>. The ability to tolerate the antimicrobial effects of polymyxin B appears to be independent of which *ompU* allele is

encoded by *V. cholerae*, as the three strains encoding environmental alleles of *ompU* had a similar survival rate (Fig. 2c). This experiment shows that OmpU<sup>GBE1114</sup> is not simply a loss of function mutant, and is not equivalent to a knockout. Third, we determined the intestinal colonization of the *ompU* mutants by performing competition assays using the infant mouse model of human infection. We found that OmpU<sup>GBE1114</sup> had a colonization defect similar to  $\Delta ompU$  whereas OmpU<sup>GBE0658</sup> was able to colonize similarly to the strain with the wild-type PG allele (Fig. 2d). These results indicate that certain naturally occurring environmental alleles of *ompU* confer properties that provide an advantage to *V. cholerae* during or prior to host colonization, as would be expected for VAPs.

The *ompU*<sup>GBE1114</sup> allele appears to be maladaptive for intestinal colonization; however, its presence in several environmental isolates of *V. cholerae* prompted us to investigate its possible adaptive role in the environment (Fig. 2e). *V. cholerae* forms biofilms on the surface of biotic and abiotic environmental surfaces,<sup>28,42-45</sup> yet biofilm formation inside the host is thought to impair intestinal colonization<sup>28,41-43,45,46</sup>. Strains with deletions in *ompU* have been shown to form a more robust biofilm on abiotic surfaces<sup>47</sup>. We found that OmpU<sup>GBE1114</sup> has higher biofilm formation than the strain encoding the wild-type PG allele, similar to the  $\Delta ompU$  strain (Fig. 2e). Both OmpU<sup>GBE0658</sup> and OmpU<sup>GBE0428</sup> formed biofilm similar to the strains with the wild-type PG allele (Fig. 2e). It therefore appears that there is an evolutionary trade-off between encoding the PG-like or EG-like alleles of VAPs, as they seem to confer mutually exclusive traits: either biofilm formation or bile resistance and host colonization. This suggests that environmental strains can be divided into subgroups which, due to their contrasting lifestyles, differ in their potential to give rise to pandemic clones.

In summary, we have determined that virulence adaptive polymorphisms are present in the environment, and shown how these VAPs can be identified, based on two independent sets of genomes. The top candidate VAP, *ompU*, was identified in both of our genomic datasets. However, the replication dataset yielded three additional candidates (Supplementary Table 5),



suggesting the potential for other VAPs to be identified with further sampling of genetically diverse environmental genomes.

Our experiments show that the *ompU* allele from some environmental strains, such as GBE0658, confers properties that allow for host colonization equally as efficient as alleles from clinical strains (Fig. 2). This leads to a natural question: Why have environmental strains with PG-like alleles not emerged as pandemic cholera strains? One immediate answer is because they might not encode the key virulence factors, CT and TCP. However, CTX $\Phi$  and VPI-1 have been found in environmental *V. cholerae* strains that do not cause disease in humans<sup>10,11,21-28</sup>. It therefore appears that a variety of virulence adaptive genes and alleles are circulating in the environment, but only the PG group encodes the optimal combination of VAPs that allowed for pandemic potential (Fig. 3). We propose a conceptual model in which VAPs circulate in a diverse, recombining environmental gene pool, being maintained in the population through various biotic and abiotic selective pressures (Fig. 3a). A new ecological opportunity occurs, such as human consumption of brackish water or transient colonization of other animal hosts, which leads to the proliferation and gradual enrichment in the population of clones encoding a mosaic of VAPs (Fig. 3b). Finally, a genome encoding a critical combination of VAPs acquires key virulence factors allowing it to emerge as a virulent, potentially pandemic clone (Fig. 3c).

Our model posits that VAPs are circulating in the environment prior to the acquisition of key virulence factors. This is based on experimental evidence that a current pandemic strain, N16961, which encodes the key virulence factors CT and TCP, cannot efficiently colonize the mammalian intestine without a PG-like *ompU* allele. If virulence adaptive alleles of *ompU* are indeed required prior to the acquisition of virulence factors, we would expect the same phenotypes of PG-like and EG-like *ompU* alleles in the genomic background of a more deeply branching PG isolate, such as classical *V. cholerae*, the cause of the first six cholera pandemics. Indeed, we found that PG-like *ompU* alleles in the classical O395 background conferred efficient host colonization (Supplementary Fig. 7), which is consistent with an *ompU*

VAP having played a role in the emergence of pathogenic *V. cholerae* prior to the acquisition of key virulence factors.

Our model further postulates that virulence adaptive alleles become enriched in the environmental population. Such enrichment would be made possible if these alleles provided a selective advantage in a newly available ecological niche, such as a human population consuming brackish water<sup>3</sup>. In previous work, we modeled an evolving, recombining microbial population that encounters a new ecological opportunity<sup>48</sup>. When adaptation to the new niche depends on few loci under positive selection in the niche, it is more likely for recombination to assemble the right combination of alleles in the same genome. These loci (akin to VAPs) could contribute additively or synergistically to fitness. For example, the PG-like *ompU* alleles confer a tenfold increase in fitness during host colonization (Fig. 2d). Other VAPs might contribute further to this enhancement in host colonization. As more loci are involved in adaptation, it becomes less likely to achieve the optimal combination. Assuming the *V. cholerae* population undergoes approximately 100 recombination events per locus per generation (6.5 recombination events for every point mutation)<sup>34</sup>, equivalent to a recombination rate of  $10^{-4}$  in the modelled population of size  $10^6$ , an optimal combination of alleles at five loci could conceivably evolve, but seven loci is very unlikely<sup>48</sup>. Therefore, if virulence depended on five or fewer positively selected loci in the *V. cholerae* genome, the optimal combination of alleles would be expected to appear repeatedly in nature. Given suitable ecological opportunities, it is then plausible that pandemic *V. cholerae* could emerge multiple times, originating from outside the PG group. However, the number of loci that are sufficient for the emergence of a virulent strain remains unknown and if it was much greater than five, pathogen emergence would be naturally limited. We identified eight candidate VAPs in our two datasets, and if all eight are phenotypically confirmed to be VAPs, this number of VAPs (<5) might naturally limit pandemic clone emergence. Furthermore, these eight candidate VAPs passed stringent filters and we suspect there might exist additional VAPs in the genome, identifiable by further sampling and experimentation. We also note that LMA3894-4, a

PG-like environmental strain containing PG-like alleles at three out of five candidate VAP loci (Supplementary Fig. 4), does not contain a predicted *ompU* ortholog, suggesting a colonization-impaired phenotype. Similarly, strain 12129 also contains PG-like alleles at these VAP loci, but has an EG-like allele of *ompU* (Fig 1d). Therefore, no genome other than PGs contains a clinical-like combination of VAPs, due either to recombination or selection limitation.

Here we have described a framework for identifying loci that are present in a natural population and confer properties beneficial for virulence prior to acquisition of essential virulence genes and host colonization. This framework could be applied to other bacterial pathogens that emerge as clonal offshoots from non-virulent relatives, including *Yersinia*, *Salmonella*, *Escherichia*, or other pathogenic *Vibrio* species<sup>1,4,7-9</sup>. Pathogens that emerged through clonal expansion limit our ability to dissect the genetic basis of their pathogenicity, because bacterial genome-wide association studies lack power when the phenotype of interest has evolved only once<sup>49</sup>. Our framework therefore provides a way forward to identify the genetic basis of virulence, even in pathogens that evolved through clonal expansion, and begin to assess the risk of pathogen emergence and reemergence from environmental gene pools.

# Methods

**Genome sequencing.** DNA from clinical isolates (Bgd1, Bgd5, Bgd8, MQ1795) and environmental isolates (GBE0428, GBE0658, GBE1068, GBE1114, GBE1173) was extracted using the Gentra kit (QIAGEN) and purified using the MoBio PowerClean Pro DNA Clean-Up Kit. Multiplexed genomic libraries were constructed using the Illumina-compatible Nextera DNA Sample Prep kit following the manufacturer's instructions. Sequencing was performed with 250-bp paired-end (v2 kit) reads on the illumina MiSeq. Sequence reads will be made available in Genbank SRA shortly.

**Genome assembly.** To exclude low-quality data, raw reads were filtered with Trimmomatic<sup>50</sup>. The 15 first bases of each reads were trimmed and reads containing at least one base with a quality score of <30 were removed. *De novo* assembly was performed on the resulting reads using Ray v2.3.1<sup>51</sup>.

**Genome alignment, annotation and SNP calling.** We used mugsy v.1 r.2.2<sup>52</sup> with default parameters to align the primary dataset of 22 *V. cholerae* genomes (Supplementary Table 1). From this alignment, we extracted dimorphic SNP sites and annotated genes according to MJ-1236 as a reference genome. We defined the core genome as locally colinear blocks (LCBs) with all 22 genomes present in the alignment. We replicated the alignment, annotation and SNP calling using 21 different *V. cholerae* genomes, mainly from Orata *et al.*<sup>33</sup>, plus the MJ-126 reference (Supplementary Table 1).

**Definition of orthologous groups.** Genomes were annotated using the RAST web server ([www.rast.nmpdr.org](http://www.rast.nmpdr.org))<sup>53</sup>. Annotated genes were clustered into orthologous groups using OrthoMCL ([www.orthomcl.org](http://www.orthomcl.org))<sup>54</sup> with default parameters, yielding 2844 orthologous groups.

**Phylogenetic analysis.** We constructed a core genome phylogeny using the concatenated alignment of 1031 single-copy orthologous protein-coding genes (present in exactly one copy in each of the 22 primary dataset genomes). Each protein sequence was aligned with Muscle<sup>55</sup>, and the concatenated alignment was used to infer an approximate maximum likelihood phylogeny with FastTree v. 2.1.8<sup>56</sup> using default parameters (Fig. 1a). Individual gene trees (Fig. 1d) were built in the same way. We constructed a neighbour-net of the 22 genomes using SplitsTree v.4.10<sup>57</sup>, based on dimorphic SNPs from the mugsy genome alignment, excluding sites with gaps.

**Tests for selection.** We conducted a genome-wide version of the McDonald-Kreitman test<sup>35</sup> by first counting the number of fixed nonsynonymous (fn), fixed synonymous (fs), polymorphic nonsynonymous (pn), and polymorphic synonymous (ps) sites within each gene. We then summed these values across all genes (FN, FS, PN, and PS) and calculated the genome-wide Fixation Index,  $FI = (FN/FS)/(PN/PS)$ . A fixation index greater than one suggests positive selection between the ingroup and outgroup (in this case, between EGs and PGs). However, care must be taken when computing a genome-wide FI because summing genes with different amounts of substitutions and polymorphism can result in  $FI > 1$  in the absence of selection<sup>58</sup>. We therefore performed 1000 permutations of the data, keeping the row totals (fn+fs and pn+ps) and column totals (fn+pn and fs+ps) constant and recomputing FI. We used the mean FI from the permutations as the expected value of FI under neutral evolution. To evaluate the hypothesis that the observed FI was higher than expected, suggesting positive selection, we computed a *P*-value as the fraction of permutations with FI greater or equal to the observed FI. We repeated the test using polymorphism from either the PG group or the EG group (Supplementary Table 3).

To identify individual genes under selection between PGs and EGs in the primary dataset, we restricted our search to 87 genes with  $fn > 0.68$  and  $fn:fs > 1.48$  (respectively two

standard deviations about the genome-wide medians). We then calculated the gene-specific FI and assessed its significance with a Fisher exact test. We found no genes with FI significantly greater than one, after Bonferroni correction for 87 tests. Similarly, in the replication dataset, we restricted our search to 26 genes with  $fn > 1.5$  and  $fn:fs > 1.70$ , none of which had significantly high FI after correction for multiple tests.

To identify genes with an excess of nonsynonymous mixed SNPs (likely due to selection for amino acid changes), we restricted our search to five genes with  $\geq 12$  NS mixed SNPs per gene and mixed NS:S  $> 1.78$  (respectively two standard deviations above the genome-wide medians). We used a one-sided binomial test to assess whether the observed NS:S ratio for each gene was significantly greater than the genome-wide median NS:S ratio of 0.5 (after adding a pseudocount of one to both NS and S). Three out of the five genes had a significantly high mixed NS:S ratio ( $P < 0.05$ ) after Bonferroni correction for five tests (Table 1). We repeated this procedure in the replication dataset, identifying genes with  $\geq 18$  NS mixed SNPs per gene and mixed NS:S  $> 1.65$  (respectively two standard deviations above the genome-wide medians). We used a one-sided binomial test to assess whether the observed NS:S ratio for each gene was significantly greater than the genome-wide median NS:S ratio of 0.33 (after adding a pseudocount of one to both NS and S). The results of these tests are shown for genes also identified in the primary dataset (Table 1) and three additional genes identified in the replication dataset (Supplementary Table 5).

**Bacterial strains and plasmids.** *V. cholerae* O395 and *V. cholerae* N16961 were used as wild-type strains of classical and El Tor biotypes respectively. Strains cultivated on solid medium were grown on LB agar; strains in liquid media were grown in aerated LB broth at 37°C. pKAS154 was used for allelic exchange<sup>59</sup>. When necessary, media was supplemented with antibiotics to select for certain plasmids or strains of *V. cholerae* at the following concentrations: gentamycin, 30µg/ml; kanamycin, 45µg/ml; polymyxin B, 50µg/ml; and streptomycin, 1 mg/ml.

**Strain construction.** In-frame deletions and exchange of *ompU* alleles in both O395 and N16961 biotypes were constructed via homologous recombination<sup>59</sup>. For *ompU* deletions, PCR was used to amplify two 500 bp fragments flanking the *ompU* gene and to introduce restriction sites for cloning into the suicide vector pKAS154. For exchange of environmental *ompU* alleles, the respective allele was also amplified using the extracted DNA from each environmental strain. Restriction sites were introduced in the primers. The fragments were then cloned into a restriction-digested suicide plasmid, pKAS154, using a four-segment ligation for each environmental allele exchange mutants (plasmid, *ompU* flanking fragments and environmental *ompU* allele). The resulting plasmids were electroporated into *Escherichia coli* S17-1 $\lambda$ pir. *E. coli* with the constructed inserts. Different sizes of *ompU* genes were confirmed, sequenced and compared to the genome sequences of environmental strains. For both deletion and exchange mutants, plasmids with the insert of interest were mated with wild-type *V. cholerae* O395 or N16961, and allelic exchange was carried out by selection on antibiotics as described previously<sup>59</sup>. For a more detailed description of allelic exchange please refer to Skorupski and Taylor 1998<sup>59</sup>. Potential mutants were screened using PCR: two primers flanking the deletion construct were used to amplify chromosomal DNA isolated from plated *V. cholerae*. The lengths of the PCR fragments were analyzed on 0.8% agarose gel for gene deletions and putative deletions and allele exchange were subsequently confirmed by DNA sequencing.

**OmpU visualization and immunoblotting.** Whole cell protein extracts were prepared from cultures grown for overnight at 37°C in a rotary shaker. The extracts were subjected to SDS-PAGE on 16% Tris Glycine gels (Invitrogen). OmpU bands were visualized after protein gels were stained by Coomassie blue overnight. Prior to staining the gels were transferred to nitrocellulose membranes using iBlot (Invitrogen). The membranes were blocked O/N in Tris-

Buffered Saline, 3% BSA. Primary OmpU antibodies were diluted 1:10,000 in TBST (Tris-Buffered Saline, 0.5% Tween-20). Membranes were incubated with primary antibodies for 2 hours at room temperature. After incubation, the membranes were washed with TBST four times. Goat anti-rabbit secondary antibodies (BioRad) were diluted 1:10,000 in TBST and incubated for 30 minutes at room temperature. The membranes were washed 4 times with TBS (Tris-Buffered Saline). Reactive protein bands were detected via ECL (Amersham).

**Survival assays.** *V. cholerae* strains were cultured overnight in LB broth at 37°C in a rotary shaker. Overnight cultures were diluted 1:100 in LB and grown to an OD600 of 0.5. Cells were pelleted and resuspended in either LB broth, LB containing 0.4% bile bovine (Sigma), or LB containing 1000U/ml of polymyxin B (Sigma). Cultures were incubated for 1h at 37°C in a rotary shaker. After incubation CFU/ml of each culture was calculated by plating dilutions in LB plates. Survival was calculated by comparing the number of CFU/ml in LB plus treatment versus LB. N≥6. No samples were excluded.

**Infant mouse competition assays.** Overnight cultures were diluted 1:100. Each test strain was mixed in a 1:1 ratio with a  $\Delta lacZ$  reference strain. Four- to five-day-old CD-1 mice (*Mus musculus*) from several mixed litters were randomly inoculated orogastrically in blinded experiments with 50μl of the bacterial mixture. Sex of the animals was not inspected prior to inoculations. The intestines were harvested 24h post-inoculation and homogenized in 4ml of LB broth containing 10% glycerol. The mixtures were serially diluted and plated on LB agar plates supplemented with streptomycin and 5-bromo-4-chloro-3-indolyl-D-galactopyramoside (X-Gal) (40μg/ml). The competition indices were calculated as previously described by others, test (output CFUs/input CFUs)/reference (output CFUs/ input CFUs) and the sample size selected was appropriate for statistical analysis. No samples or animals were excluded.



381

382 **Biofilm assays.** 96-well plate assay. Cultures were incubated overnight at 30°C. 100µl of 1:100

383 dilutions of overnight cultures were placed per well in 96-well plates. Plates were left at 25°C for

384 24h. Liquid contents were discarded and plates were washed 2 times with LB. 200µl of 0.01%

385 crystal violet was added per well and incubated at room temperature for 5 minutes. Liquid

386 contents were discarded and plates were washed extensively with dH<sub>2</sub>O. After the plates were

387 dry, biofilms were resuspended in 150µl of 50% acetic acid. Contents were transferred to a flat

388 bottom dish and quantitated in a microtiter plate reader at OD550. Values were plotted using

389 Prism software. N=15.

390

# **Supplementary Text**

## **Choice of genomes and power considerations**

In the primary dataset, we sought a sample that spanned the genetic diversity within both PG and EG groups. The PG group contains two clades, PG-1 and PG-2 (as defined by Chun et al. 2009), and later confirmed by Mutreja et al. <sup>15</sup>, who defined lineages L2,3,4,5,6 and 8 within PG-1, and L1 and 7 are PG-2). To span the genetic diversity of PG, the primary dataset contained 6 genomes from PG-1 (including representatives of all 3 waves of the 7th pandemic defined by Mutreja et al.: N16961 from Wave 1, MJ1236 from Wave 2, and Bgd1, Bgd5, Bgd8 and MQ1795 from Wave 3) and one genome from PG-2 (O395, from Mutreja's L1). The relationships among all PG genomes used in this study is illustrated in Supplementary Figure 8.

We found that adding PGs does not significantly affect our detection of fixed or mixed SNPs (Supplementary Figure 9, panels a and b). This is because PGs are very closely related, and adding new genomes does not add much genetic diversity. As a result, the effect of including a PG-2 strain (O395, the deepest branch within the PG clade) has a much bigger impact on the detection of fixed and mixed SNPs than the number of genomes included (compare cyan and dark blue points in Supplementary Figure 9). Whether O395 is included or not, the number of fixed SNPs declines very slightly as new genomes are added. This is expected because SNPs that in reality are polymorphic (not fixed) within PG are more likely to be falsely identified as fixed when fewer genomes are sampled. Similarly, the number of mixed SNPs identified declines as more PGs are added. This is because mixed SNPs must by definition be fixed in PGs, but polymorphic in EGs. Together, these results show that, unless new deep-branching lineages (like PG-2) are identified within PG, sampling additional genomes should not greatly affect the dataset of fixed or mixed SNPs. Conversely, EG sampling has a large effect: adding more EGs reduces the number of fixed SNPs identified and increases the number of mixed SNPs, because polymorphic sites are more likely to be sampled as more genetic diversity within EGs is added (Supplementary Figure 9, panels c and d). However, both

the number of fixed and mixed SNPs reach a plateau at around 12 sampled EGs, suggesting that additional sampling is unlikely to yield more mixed SNPs (which would increase power to detect putative VAPs) or to greatly reduce the number of false-positive fixed SNPs. Therefore, it seems that our power to detect fixed or mixed SNPs is unlikely to change significantly with further sampling.

Despite this encouraging result, we nevertheless considered a replication dataset of 15 different EGs and 6 different PGs. Like the primary dataset, the replication dataset also contained 6 genomes from PG-1 (including 7th pandemic strains MJ1236, MO10, and 2010EL, as well as pre-7th pandemic strains BX330286, 274080, and MAK757, from Mutreja et al.'s L8, L3, and L5, respectively) and one genome from PG-2 (V52, from Mutreja's L7). Our motivation for considering the replication dataset was, first, that Orata et al.<sup>33</sup> recently identified five clonal complexes on long branches which would be expected to add additional genetic diversity to the EG group, and second, that the power to detect SNPs depends not just on their existence (*i.e.* the actual genetic diversity), but also the quality of the alignment (*i.e.* if true SNPs are present in the alignment). Therefore, the quality of genome assembly and alignment should also affect our ability to detect SNPs. While the primary dataset generally contained assemblies of good quality (median of 55.5 contigs and N50 of 251 Kbp; Supplementary Table 7), a few EG assemblies were poorer (*e.g.* 314 contigs in strain 62339; 269 contigs in CT536993). In contrast, the replication dataset contained no genomes with >150 contigs, yielding a substantially less fragmented alignment (with fewer and longer locally colinear blocks compared to the primary dataset) with a larger core genome (Supplementary Table 8). Due to a combination of additional genetic diversity and a better alignment, the number of mixed SNPs more than doubled in the replication dataset compared to the primary dataset (Supplementary Table 2). This suggests that our power estimates (Supplementary Figure 9) are not entirely realistic, and sampling additional EGs with high-quality assemblies will likely yield more mixed SNPs. However, power to identify mixed SNPs is not the same as power to identify VAPs, which was the goal of our

443 study. Despite identifying more mixed SNPs, the replication dataset only revealed three new  
444 candidate VAPs (Supplementary Table 5) and validated some of those found in the primary  
445 dataset (Table 1). Therefore, while additional sampling of EGs is likely to yield more mixed  
446 SNPs, we expect the number of new VAPs identified to be modest.

# References

1. McNally, A., Thomson, N. R., Reuter, S. & Wren, B. W. 'Add, stir and reduce': *Yersinia* spp. as model bacteria for pathogen evolution. *Nat. Rev. Microbiol.* **14**, 177–190 (2016).
2. Luo, C. *et al.* Genome sequencing of environmental *Escherichia coli* expands understanding of the ecology and speciation of the model bacterial species. *Proc. Natl. Acad. Sci. U.S.A.* **108**, 7200–7205 (2011).
3. Boucher, Y., Orata, F. D. & Alam, M. The out-of-the-delta hypothesis: dense human populations in low-lying river deltas served as agents for the evolution of a deadly pathogen. *Front. Microbiol.* **6**, L19401 (2015).
4. Reen, F. J., Almagro-Moreno, S., Ussery, D. & Boyd, E. F. The genomic code: inferring Vibrionaceae niche specialization. *Nat. Rev. Microbiol.* **4**, 697–704 (2006).
5. Ochman, H., Lawrence, J. G. & Groisman, E. A. Lateral gene transfer and the nature of bacterial innovation. *Nature* **405**, 299–304 (2000).
6. Shapiro, B. J. How clonal are bacteria over time? *Curr. Opin. Microbiol.* **31**, 116–123 (2016).
7. Groisman, E. A. & Ochman, H. Pathogenicity islands: bacterial evolution in quantum leaps. *Cell* **87**, 791–794 (1996).
8. Ochman, H. Genes lost and genes found: evolution of bacterial pathogenesis and symbiosis. *Science* **292**, 1096–1099 (2001).
9. Cui, Y. *et al.* Epidemic Clones, Oceanic Gene Pools, and Eco-LD in the Free Living Marine Pathogen *Vibrio parahaemolyticus*. *Mol. Biol. Evol.* **32**, 1396–1410 (2015).
10. Chun, J. *et al.* Comparative genomics reveals mechanism for short-term and long-term clonal transitions in pandemic *Vibrio cholerae*. *Proc. Natl. Acad. Sci. U.S.A.* **106**, 15442–15447 (2009).
11. Faruque, S. M. & Mekalanos, J. J. Pathogenicity islands and phages in *Vibrio cholerae* evolution. *Trends Microbiol.* **11**, 505–510 (2003).
12. Kaper, J. B., Morris, J. G. & Levine, M. M. Cholera. *Clin. Microbiol. Rev.* **8**, 48–86 (1995).
13. Harris, J. B., LaRocque, R. C., Qadri, F., Ryan, E. T. & Calderwood, S. B. Cholera. *Lancet* **379**, 2466–2476 (2012).
14. Boucher, Y. Sustained local diversity of *Vibrio cholerae* O1 biotypes in a previously cholera-free country. *mBio* **7**, e00570–16 (2016).
15. Mutreja, A. *et al.* Evidence for several waves of global transmission in the seventh cholera pandemic. *Nature* **477**, 462–465 (2011).
16. De, S. N., Bhattacharya, K. & Sarkar, J. K. A study of the pathogenicity of strains of *Bacterium coli* from acute and chronic enteritis. *J. Pathol. Bacteriol.* **71**, 201–209 (1956).
17. Taylor, R. K., Miller, V. L., Furlong, D. B. & Mekalanos, J. J. Use of *phoA* gene fusions to identify a pilus colonization factor coordinately regulated with cholera toxin. *Proc. Natl. Acad. Sci. U.S.A.* **84**, 2833–2837 (1987).
18. Waldor, M. K. & Mekalanos, J. J. Lysogenic conversion by a filamentous phage encoding cholera toxin. *Science* **272**, 1910–1914 (1996).
19. Karaolis, D. K. *et al.* A *Vibrio cholerae* pathogenicity island associated with epidemic and pandemic strains. *Proc. Natl. Acad. Sci. U.S.A.* **95**, 3134–3139 (1998).
20. Almagro-Moreno, S., Murphy, R. A. & Boyd, E. F. How genomics has shaped our understanding of the evolution and emergence of pathogenic *Vibrio cholerae*. In *Genomes of Foodborne and Waterborne Pathogens* 85–99 (ASM Press, 2011).
21. Faruque, S. M. *et al.* Analysis of clinical and environmental strains of nontoxigenic *Vibrio cholerae* for susceptibility to CTXPhi: molecular basis for origination of new strains with epidemic potential. *Infect. Immun.* **66**, 5819–5825 (1998).
22. Rahman, M. H. *et al.* Distribution of genes for virulence and ecological fitness among diverse *Vibrio cholerae* population in a cholera endemic area: tracking the evolution of pathogenic strains. *DNA and Cell Biology* **27**, 347–355 (2008).
23. Faruque, S. M. *et al.* Genetic diversity and virulence potential of environmental *Vibrio cholerae* population in a cholera-endemic area. *Proc. Natl. Acad. Sci. U.S.A.* **101**, 2123–2128 (2004).
24. Chakraborty, S. *et al.* Virulence genes in environmental strains of *Vibrio cholerae*. *Appl. Environ. Microbiol.* **66**, 4022–4028 (2000).
25. Rivera, I. N., Chun, J., Huq, A., Sack, R. B. & Colwell, R. R. Genotypes associated with virulence in environmental isolates of *Vibrio cholerae*. *Appl. Environ. Microbiol.* **67**, 2421–2429 (2001).
26. Mukhopadhyay, A. K., Chakraborty, S., Takeda, Y., Nair, G. B. & Berg, D. E. Characterization of VPI pathogenicity island and CTXphi prophage in environmental strains of *Vibrio cholerae*. *J. Bacteriol.* **183**, 4737–4746 (2001).
27. Gennari, M., Ghidini, V. & Lleo, M. M. Virulence genes and pathogenicity islands in environmental *Vibrio* strains non-pathogenic to humans. *FEMS Microbiol. Ecol.* **82**, 563–573 (2012).
28. Almagro-Moreno, S. & Taylor, R. K. Cholera: Environmental reservoirs and impact on disease transmission. *Microbiol. Spect.* **1**, 149–165 (2013).

29. Dalsgaard, A. *et al.* Characterization of *Vibrio cholerae* non-O1 serogroups obtained from an outbreak of diarrhea in Lima, Peru. *J. Clin. Microbiol.* **33**, 2715–2722 (1995).
30. Bag, P. K. *et al.* Putative virulence traits and pathogenicity of *Vibrio cholerae* Non-O1, Non-O139 isolates from surface waters in Kolkata, India. *Appl. Environ. Microbiol.* **74**, 5635–5644 (2008).
31. Dziejman, M. *et al.* Genomic characterization of non-O1, non-O139 *Vibrio cholerae* reveals genes for a type III secretion system. *Proc. Natl. Acad. Sci. U.S.A.* **102**, 3465–3470 (2005).
32. Schuster, B. M. *et al.* Ecology and genetic structure of a northern temperate *Vibrio cholerae* population related to toxigenic isolates. *Appl. Environ. Microbiol.* **77**, 7568–7575 (2011).
33. Orata, F. D. *et al.* The dynamics of genetic interactions between *Vibrio metoecus* and *Vibrio cholerae*, two close relatives co-occurring in the environment. *Genome Biol. Evol.* **7**, 2941–2954 (2015).
34. Keymer, D. P. & Boehm, A. B. Recombination shapes the structure of an environmental *Vibrio cholerae* population. *Appl. Environ. Microbiol.* **77**, 537–544 (2011).
35. McDonald, J. H. & Kreitman, M. Adaptive protein evolution at the Adh locus in *Drosophila*. *Nature* **351**, 652–654 (1991).
36. Pérez Chaparro, P. J. *et al.* Whole genome sequencing of environmental *Vibrio cholerae* O1 from 10 nanograms of DNA using short reads. *J. Microbiol. Methods* **87**, 208–212 (2011).
37. Mathur, J. & Waldor, M. K. The *Vibrio cholerae* ToxR-regulated porin OmpU confers resistance to antimicrobial peptides. *Infect. Immun.* **72**, 3577–3583 (2004).
38. Provenzano, D., Lauriano, C. M. & Klose, K. E. Characterization of the role of the ToxR-modulated outer membrane porins OmpU and OmpT in *Vibrio cholerae* virulence. *J. Bacteriol.* **183**, 3652–3662 (2001).
39. Provenzano, D., Schuhmacher, D. A., Barker, J. L. & Klose, K. E. The virulence regulatory protein ToxR mediates enhanced bile resistance in *Vibrio cholerae* and other pathogenic *Vibrio* species. *Infect. Immun.* **68**, 1491–1497 (2000).
40. Merrell, D. S., Bailey, C., Kaper, J. B. & Camilli, A. The ToxR-mediated organic acid tolerance response of *Vibrio cholerae* requires OmpU. *J. Bacteriol.* **183**, 2746–2754 (2001).
41. Almagro-Moreno, S., Pruss, K. & Taylor, R. K. Intestinal colonization dynamics of *Vibrio cholerae*. *PLoS Pathog.* **11**, e1004787 (2015).
42. Yildiz, F. H. & Schoolnik, G. K. *Vibrio cholerae* O1 El Tor: identification of a gene cluster required for the rugose colony type, exopolysaccharide production, chlorine resistance, and biofilm formation. *Proc. Natl. Acad. Sci. U.S.A.* **96**, 4028–4033 (1999).
43. Watnick, P. I., Fullner, K. J. & Kolter, R. A role for the mannose-sensitive hemagglutinin in biofilm formation by *Vibrio cholerae* El Tor. *J. Bacteriol.* **181**, 3606–3609 (1999).
44. Watnick, P. I. & Kolter, R. Steps in the development of a *Vibrio cholerae* El Tor biofilm. *Mol. Microbiol.* **34**, 586–595 (1999).
45. Marsh, J. W. & Taylor, R. K. Genetic and transcriptional analyses of the *Vibrio cholerae* mannose-sensitive hemagglutinin type 4 pilus gene locus. *J. Bacteriol.* **181**, 1110–1117 (1999).
46. Hsiao, A., Liu, Z., Joelsson, A. & Zhu, J. *Vibrio cholerae* virulence regulator-coordinated evasion of host immunity. *Proc. Natl. Acad. Sci. U.S.A.* **103**, 14542–14547 (2006).
47. Valeru, S. P., Wai, S. N., Saeed, A., Sandström, G. & Abd, H. ToxR of *Vibrio cholerae* affects biofilm, rugosity and survival with *Acanthamoeba castellanii*. *BMC Res Notes* **5**, 33 (2012).
48. Friedman, J., Alm, E. J. & Shapiro, B. J. Sympatric speciation: when is it possible in bacteria? *PLoS ONE* **8**, e53539 (2013).
49. Chen, P. E. & Shapiro, B. J. The advent of genome-wide association studies for bacteria. *Curr. Opin. Microbiol.* **25**, 17–24 (2015).
50. Bolger, A. M., Lohse, M. & Usadel, B. Trimmomatic: a flexible trimmer for Illumina sequence data. *Bioinformatics* **30**, 2114–2120 (2014).
51. Boisvert, S., Raymond, F., Godzaridis, É., Laviolette, F. & Corbeil, J. Ray Meta: scalable de novo metagenome assembly and profiling. *Genome Biol.* **13**, R122 (2012).
52. Angiuoli, S. V. & Salzberg S. L. Mugsy: fast multiple alignment of closely related whole genomes. *Bioinformatics* **27**, 334–342 (2011).
53. Aziz, R. K. *et al.* The RAST Server: Rapid annotations using subsystems technology. *BMC Genomics* **9**, 1 (2008).
54. Li, L., Stoeckert, C. J. & Roos, D. S. OrthoMCL: identification of ortholog groups for eukaryotic genomes. *Genome Res.* **13**, 2178–2189 (2003).
55. Edgar, R. C. MUSCLE: multiple sequence alignment with high accuracy and high throughput. *Nucleic Acids Res.* **32**, 1792–1797 (2004).
56. Price, M. N., Dehal, P. S. & Arkin, A. P. FastTree 2 – approximately maximum-likelihood trees for large alignments. *PLoS ONE* **5**, e9490 (2010).
57. Bryant, D. & Moulton, V. Neighbor-net: an agglomerative method for the construction of phylogenetic networks. *Mol. Biol. Evol.* **21**, 255–265 (2004).
58. Shapiro, J. A. *et al.* Adaptive genic evolution in the *Drosophila* genomes. *Proc. Natl. Acad. Sci. U.S.A.* **104**, 2271–2276 (2007).

- 569 59. Skorupski, K. & Taylor, R. K. Positive selection vectors for allelic exchange. *Gene* **169**, 47–52 (1996).
- 570 60. Son, M. S., Megli, C. J., Kovacikova, G., Qadri, F. & Taylor, R. K. Characterization of *Vibrio cholerae* O1 El
- 571 Tor biotype variant clinical isolates from Bangladesh and Haiti, including a molecular genetic analysis of
- 572 virulence genes. *J. Clin. Microbiol.* **49**, 3739–3749 (2011).
- 573 61. Nair, G. B. *et al.* New variants of *Vibrio cholerae* O1 biotype El Tor with attributes of the classical biotype from
- 574 hospitalized patients with acute diarrhea in Bangladesh. *J. Clin. Microbiol.* **40**, 3296–3299 (2002).
- 575

## 576 **Acknowledgements**

577 The authors would like to thank the anonymous reviewers for their thoughtful comments and  
 578 suggestions. We would also like to thank Otto Cordero, Yves Terrat, Nicolas Tromas and  
 579 Britney Privett for constructive comments on the manuscript. We thank Lawrence Shelven for  
 580 his highly valuable technical assistance. BJS was supported by a Canada Research Chair and  
 581 the Canadian Institutes for Health Research. RKT was supported by a National Institutes of  
 582 Health grants AI039654 and AI025096. SAM was supported by startup funds from the Burnett  
 583 School of Biomedical Sciences at the University of Central Florida and Dartmouth College's E.  
 584 E. Just Postdoctoral Fellowship.



## 585 Figures

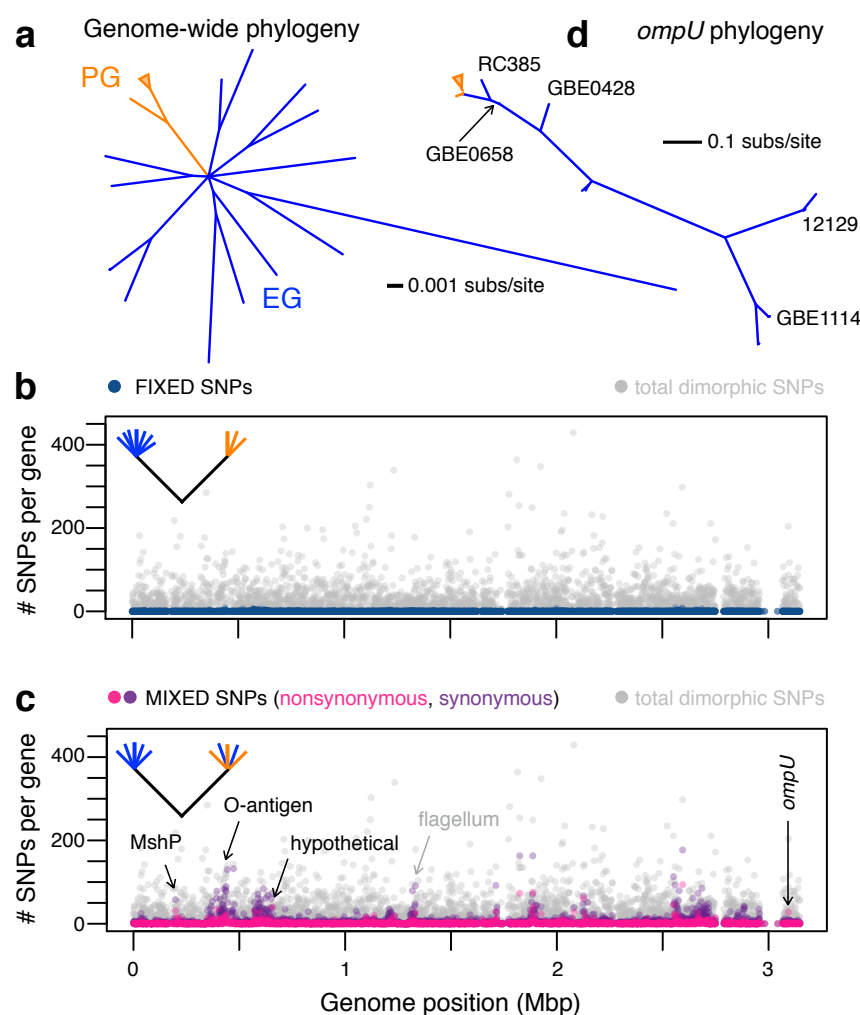

586

### 587 **Figure 1. Comparative genomics reveals candidate virulence adaptive polymorphisms.**

588 **a**, Phylogeny of 22 *V. cholerae* genomes based on 1031 single-copy orthologs in the primary dataset. All  
589 branches have local support values >0.99 (based on FastTree's approximate likelihood ratio test) except  
590 for very short, deep internal branches (resulting in the star-like polytomy at the centre of the tree). Not all  
591 22 genomes are visible because some have nearly identical sequences (e.g. 6 of the 7 PG genomes are  
592 nearly identical, shown as an orange triangle; GBE1173 and GBE1114 are nearly identical, as can be  
593 seen in Supplementary Figure 1). **b**, Distribution of fixed SNPs across chromosome 1. (See  
594 Supplementary Fig. 3 for chromosome 2). Genome position is according to the MJ-1236 reference  
595 genome. SNP-free regions (e.g. near 3 Mbp, the locus of the integrative conjugative element) are part of  
596 the flexible genome, present in the reference but not the other 21 genomes. The schematic tree in the top  
597 left illustrates the fixed SNP pattern, in which one allele is present in PGs and a different allele in EGs. **c**,  
598 Distribution of mixed SNPs across the genome. The cartoon tree in the top left illustrates the mixed SNP  
599 pattern, in which one allele is fixed in PGs, and another allele is polymorphic among EGs, with some EGs  
600 containing the PG-like allele. Black arrows show candidate VAPs (Table 1). Grey arrow shows the  
601 flagellum as an example variable region not containing candidate VAPs. **d**, *ompU* phylogeny. All visible  
602 branches have local support values >0.9 except for the branch separating RC385 and GBE0658, the  
603 branch grouping MJ-1236 and O395 together, and the branch grouping HE09 and VL426 together.

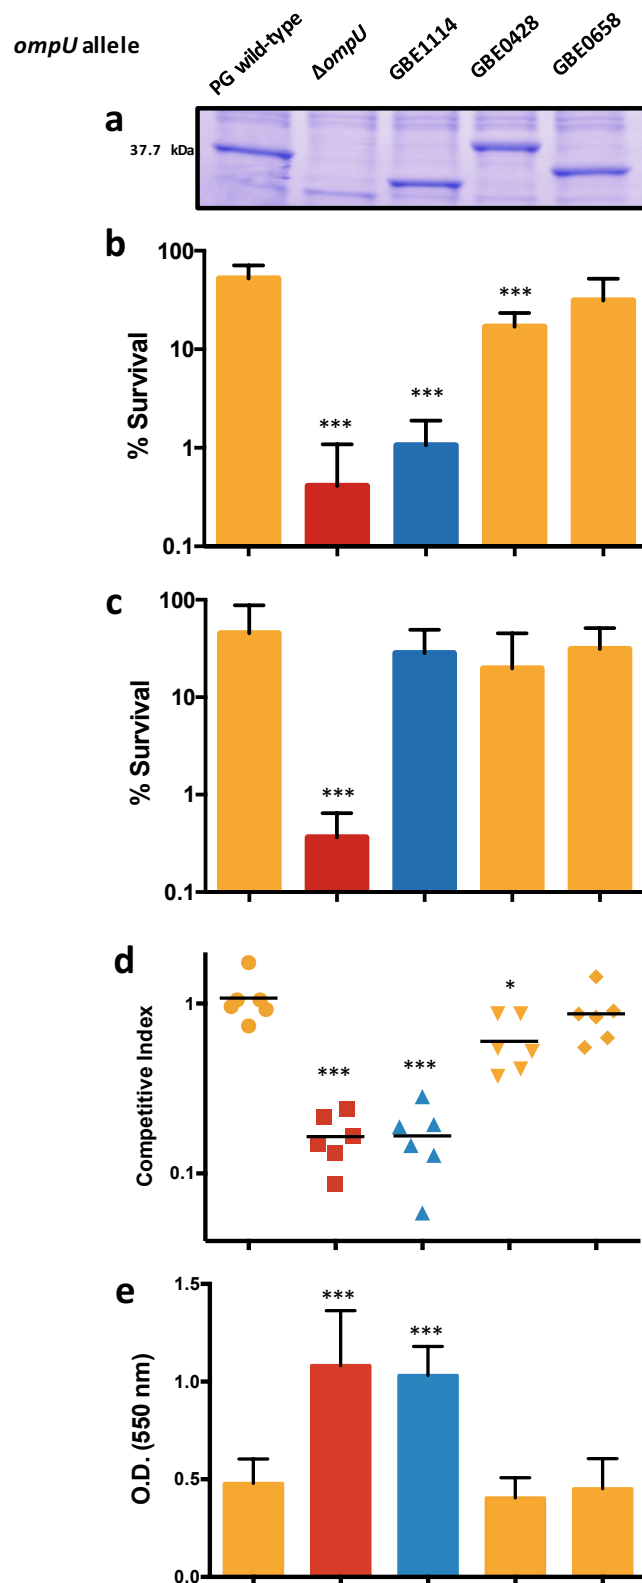

**Figure 2. Phenotypic characterization of *ompU* alleles.** **a**, OmpU production in clinical strains of *V. cholerae* encoding environmental alleles of *ompU*. Total protein lysates were run on a 16% Tris-glycine gel. OmpU bands were visualized after protein gels were stained with Coomassie blue. **b**, Survival of *ompU* mutants in the presence of bile (n=7) or **c**, polymyxin B (n=6). **d**, Colonization of the small intestine of *ompU* mutant strains (n=6). **e**, Biofilm formation of *ompU* mutant strains on an abiotic surface (n=15). Yellow bars and symbols, PG-like allele; red bars and squares,  $\Delta ompU$ ; blue bars and triangles, EG-like allele. Center values represent the mean and error bars the standard deviation. Variance between the groups was similar. Statistical comparisons were made using student's *t*-test. \**P* < 0.05, \*\*\**P* < 0.001.

# Figure 3

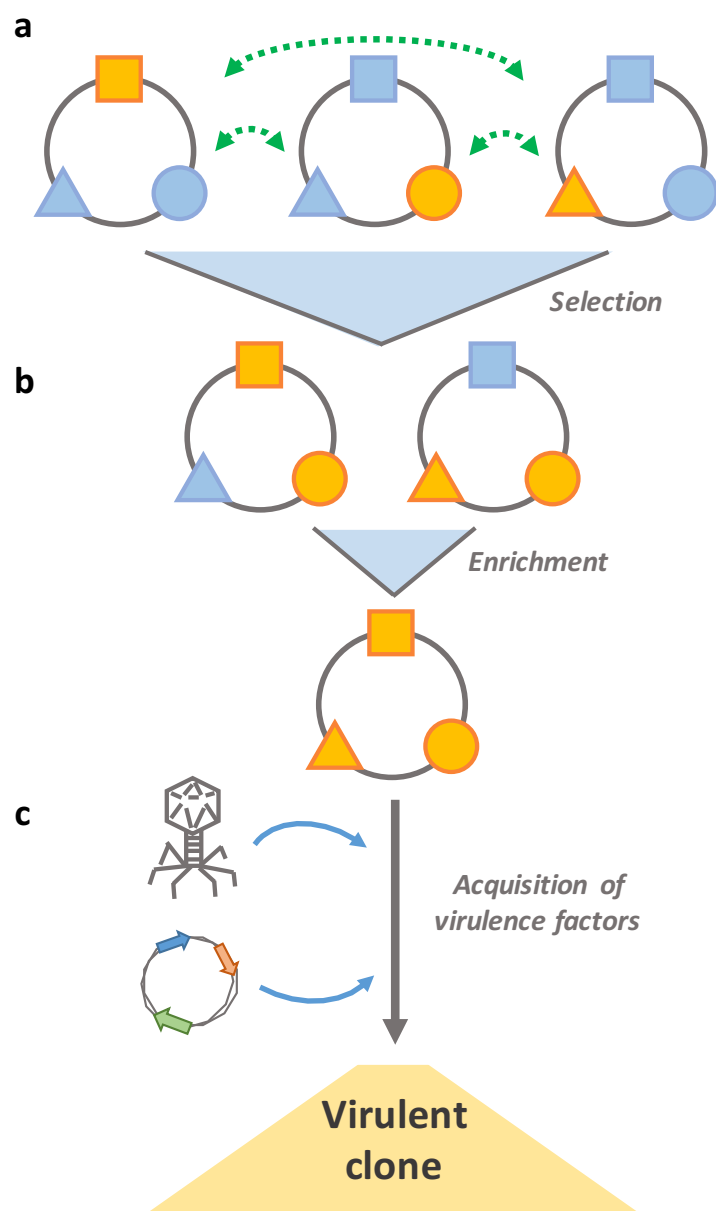

**Figure 3. Model of pandemic clone emergence from an environmental gene pool.** We propose a model that involves three events required for the emergence of pathogenic clones from environmental populations. **a**, selection of VAPs. Virulence adaptive alleles circulate in naturally occurring populations (orange symbols) and can be exchanged and mobilized through recombination (green dashed arrows). Ecological events (temperature, nutrient availability, pH, etc.) lead to the selection of VAPs and an increase in their distribution in environmental populations. **b**, enrichment of clones. A new ecological opportunity occurs (human consumption of untreated waters, transient colonization of new environmental hosts, etc.) which leads to the proliferation and enrichment in the population of clones encoding a mosaic of VAPs. **c**, acquisition of virulence factors. A strain encoding a minimum set of VAPs required for host colonization acquires the virulence factors that are necessary to produce a successful infection and subsequently undergoes intra-host evolution and expansion.

# Tables

**Table 1. Characteristics of five predicted VAPs with an excess of nonsynonymous mixed SNPs.**

| Gene ID (VCD #) | Annotation                    | Gene length (bp) | Total # SNPs | Mixed <i>dN</i> | Mixed <i>dS</i> | Mixed <i>dN/dS</i> | Mixed NS | Mixed S | <i>P</i>           |
|-----------------|-------------------------------|------------------|--------------|-----------------|-----------------|--------------------|----------|---------|--------------------|
| 1 003778        | outer membrane protein OmpU   | 1053             | 204 (110)    | 0.037 (0.018)   | 0.045 (0.033)   | 0.83 (0.53)        | 28 (13)  | 11 (8)  | 0.0047* (0.0068*)  |
| 2 001600        | hypothetical                  | 258              | 21 (26)      | 0.082 (0.12)    | 0.081 (0.065)   | 1.01 (1.82)        | 15 (22)  | 4 (3)   | 0.0096* (2.32e-8*) |
| 3 001013        | hypothetical                  | 642              | 19 (13)      | 0.034 (0.006)   | 0.029 (0.012)   | 1.18 (0.55)        | 15 (2)   | 4 (1)   | 0.0096* (n.s.)     |
| 4 001209        | MSHA biogenesis protein MshP  | 432              | 85 (63)      | 0.047 (0.025)   | 0.045 (0.054)   | 1.04 (0.46)        | 14 (7)   | 4 (5)   | 0.0154 (0.066)     |
| 5 001230        | lipid A core O-antigen ligase | 1794             | 75 (47)      | 0.0098 (0.001)  | 0.013 (0.004)   | 0.76 (0.18)        | 12 (0)   | 5 (1)   | 0.0717 (n.s.)      |

NS=nonsynonymous; S=synonymous. *dN* = number of nonsynonymous SNPs per nonsynonymous site; *dS* = number of synonymous SNPs per synonymous site. Mixed SNPs are polymorphic in EGs but fixed in PGs, meaning that at least one EG contains a PG-like allele. The genes listed have mixed NS, mixed NS:S, and mixed *dN/dS* each over two standard deviations above their respective genome-wide medians in the primary dataset. A one-sided binomial test determined if the mixed NS:S ratio was greater than the expected genome-wide median value of 0.5 per gene (uncorrected *P*-values shown; asterisks (\*) indicate *P* < 0.05 after Bonferroni correction for five tests). Numbers in parentheses are for the replication dataset, with an expected genome-wide median mixed N:S of 0.33. *P*-values greater than 0.1 are denoted as not significant (n.s.). Genes 1, 2, 4, and 5 are indicated with arrows on Figure 1C. Gene 3 is on chromosome 2 (Supplementary Figure 3).

## 633 Supplementary Figures

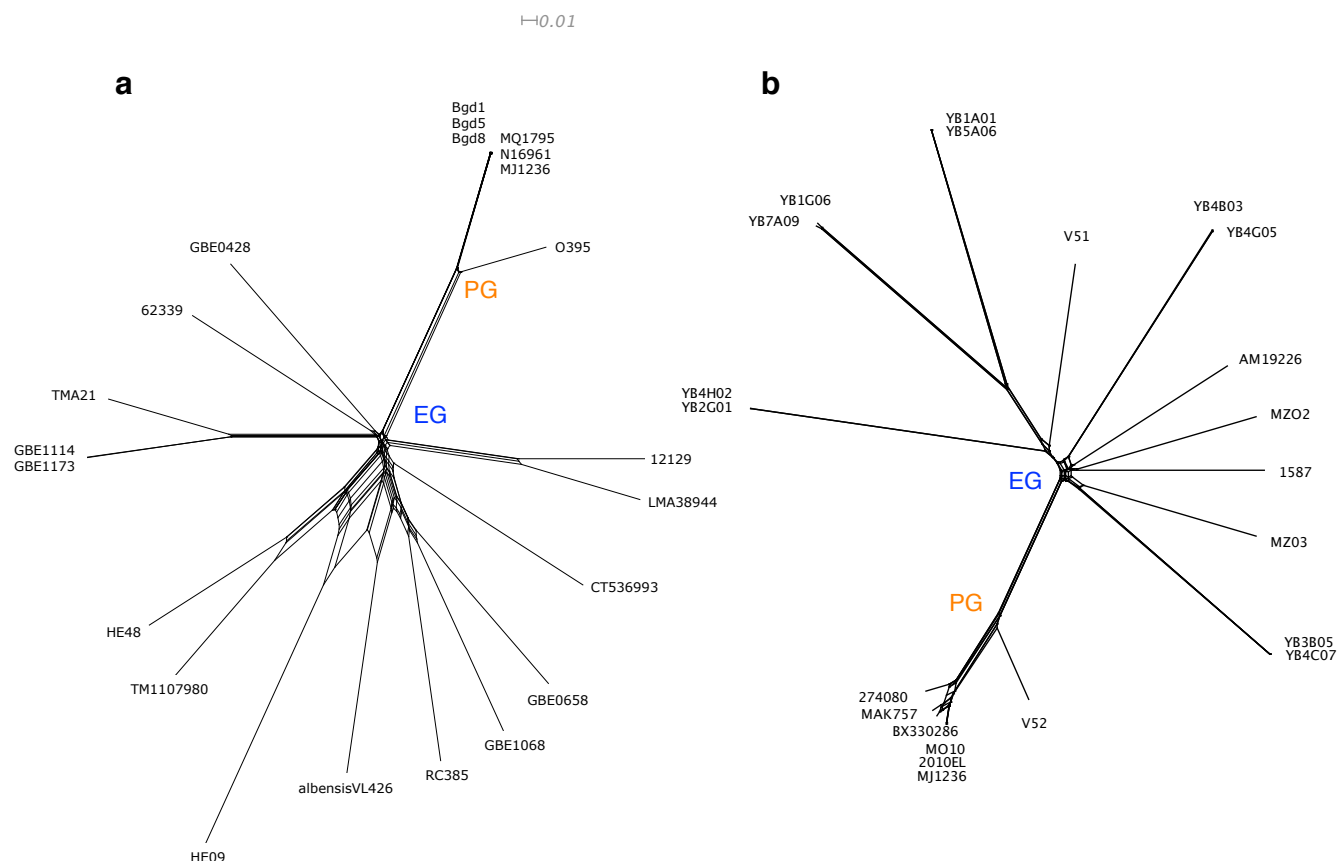

**Supplementary Figure 1. Splittree showing relationship of environmental (EG) and pandemic (PG) *V. cholerae* genomes.** **a**, The neighbour-net is based on dimorphic sites in the alignment of 22 genomes in the primary dataset, excluding sites with gaps. Only alignment blocks (locally colinear blocks produced by mugsy) including all 22 genomes were included, yielding 126,099 dimorphic sites. **b**, The neighbour-net based on 142,797 dimorphic sites in an alignment of 22 different genomes in the replication dataset. The general star-like topology remains the same, with PGs clustering closely together at the end of one long branch.

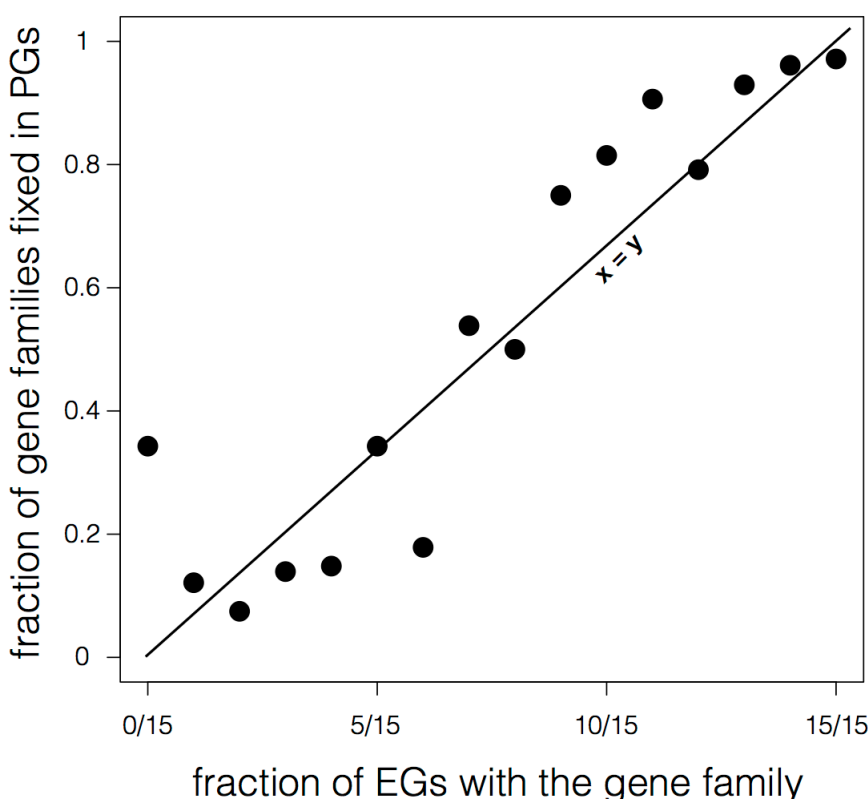

**Supplementary Figure 2. PG strains sample genes randomly from the environmental pool.** Gene families from OrthoMCL were binned by their frequency in environmental genomes (EGs), ranging from being present in zero to all 15 EGs in the primary dataset (x-axis). Within each of these bins, we calculated the fraction of gene families fixed (e.g. present in all seven) phylocore genomes (PGs). For example, the point in the top right includes 1817 gene families present in all 15 EGs, of which 1765 are also present in all seven PGs, yielding a fraction of 0.97 fixed in PGs. The points fall closely along the  $x=y$  line, with an outlier due to an excess of gene families (12 out of 35) fixed in PGs but absent in EGs (present in 0/15 EGs). The observation that the fixation probability (y-axis) scales approximately linearly with gene frequency in the environment (x-axis) suggests that PGs sample genes approximately randomly from the environmental pool. The 12 gene families fixed in PGs but absent in EGs seem to depart from the random expectation, suggesting a role for selection (Supplementary Table 2).

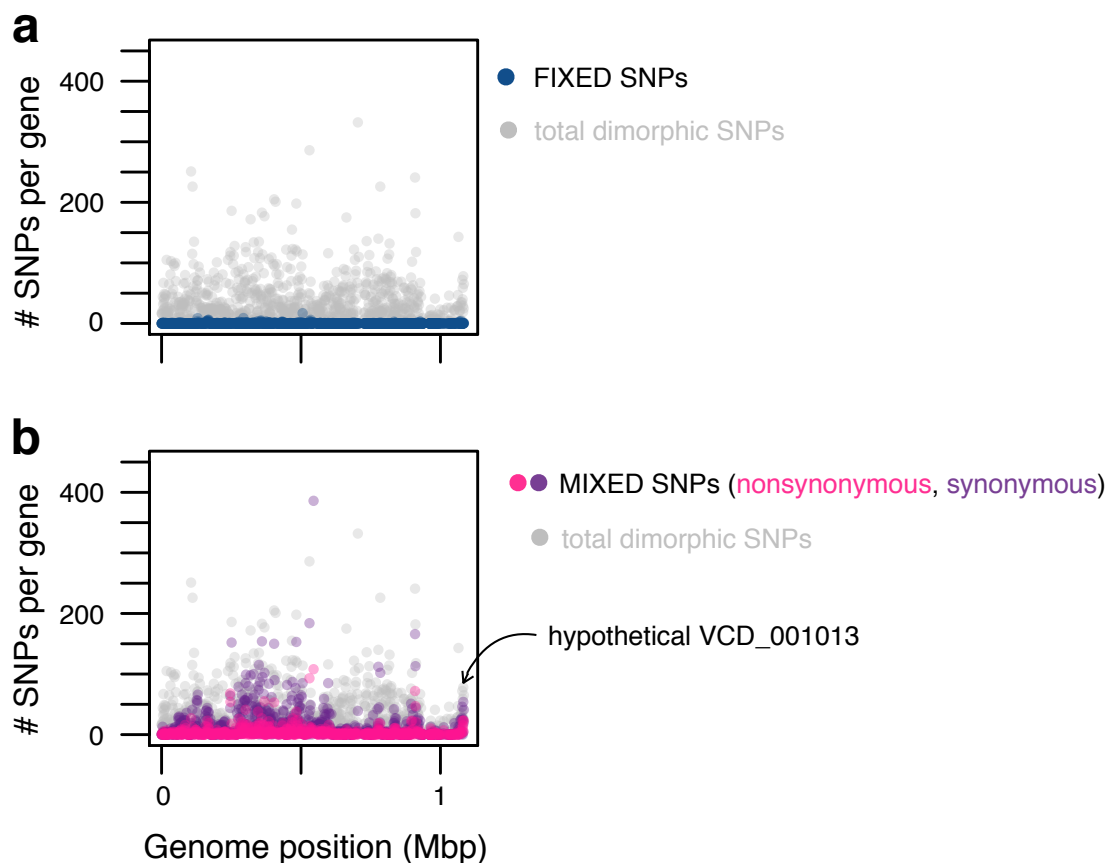

656

657 **Supplementary Figure 3. Distribution of fixed and mixed SNPs across chromosome 2. a,**  
658 **Distribution of fixed SNPs across chromosome 2 in the primary dataset. b, Distribution of mixed SNPs**  
659 **across chromosome 2. Genome position is according to the MJ-1236 reference genome. See Fig. 1b and**  
660 **1c in the main text for descriptions of fixed and mixed SNP sites. Arrow shows a candidate VAP (Table 1).**  
661

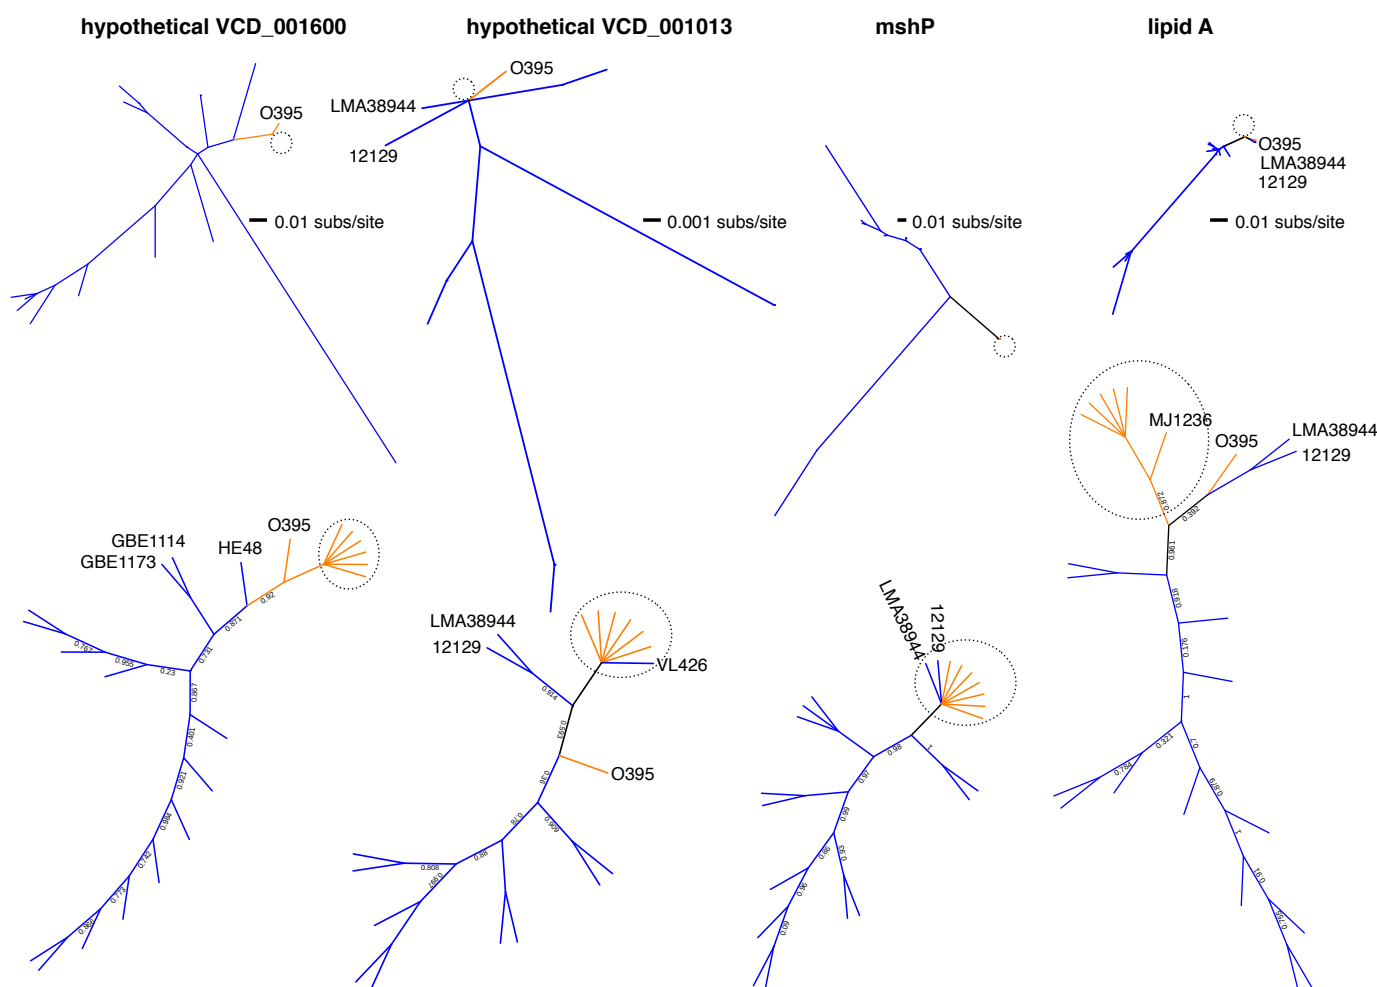

**Supplementary Figure 4. Gene trees for additional candidate VAPs.** Gene trees are shown for the four other candidate VAPs listed in Table 1, excluding *ompU* (Figure 1d). Top panels show branch lengths to scale; bottom panels show local support values and branches not to scale. Branches leading to EGs are blue; branches leading to PGs are in orange. The dotted circle indicates a clade containing most of the PGs (sometimes without O395 and sometimes with EGs, as indicated) which have identical sequences and are not visible in trees with branch lengths to scale (top). The lipid A core O-antigen ligase (VCD\_001230) and *ompU* (Figure 1d) were grouped into orthologous gene families, which were aligned with Muscle and used to infer trees with FastTree. The other three genes were not grouped into gene families and were extracted from the mugsy alignment, realigned with Muscle and used to infer trees with FastTree (Methods).



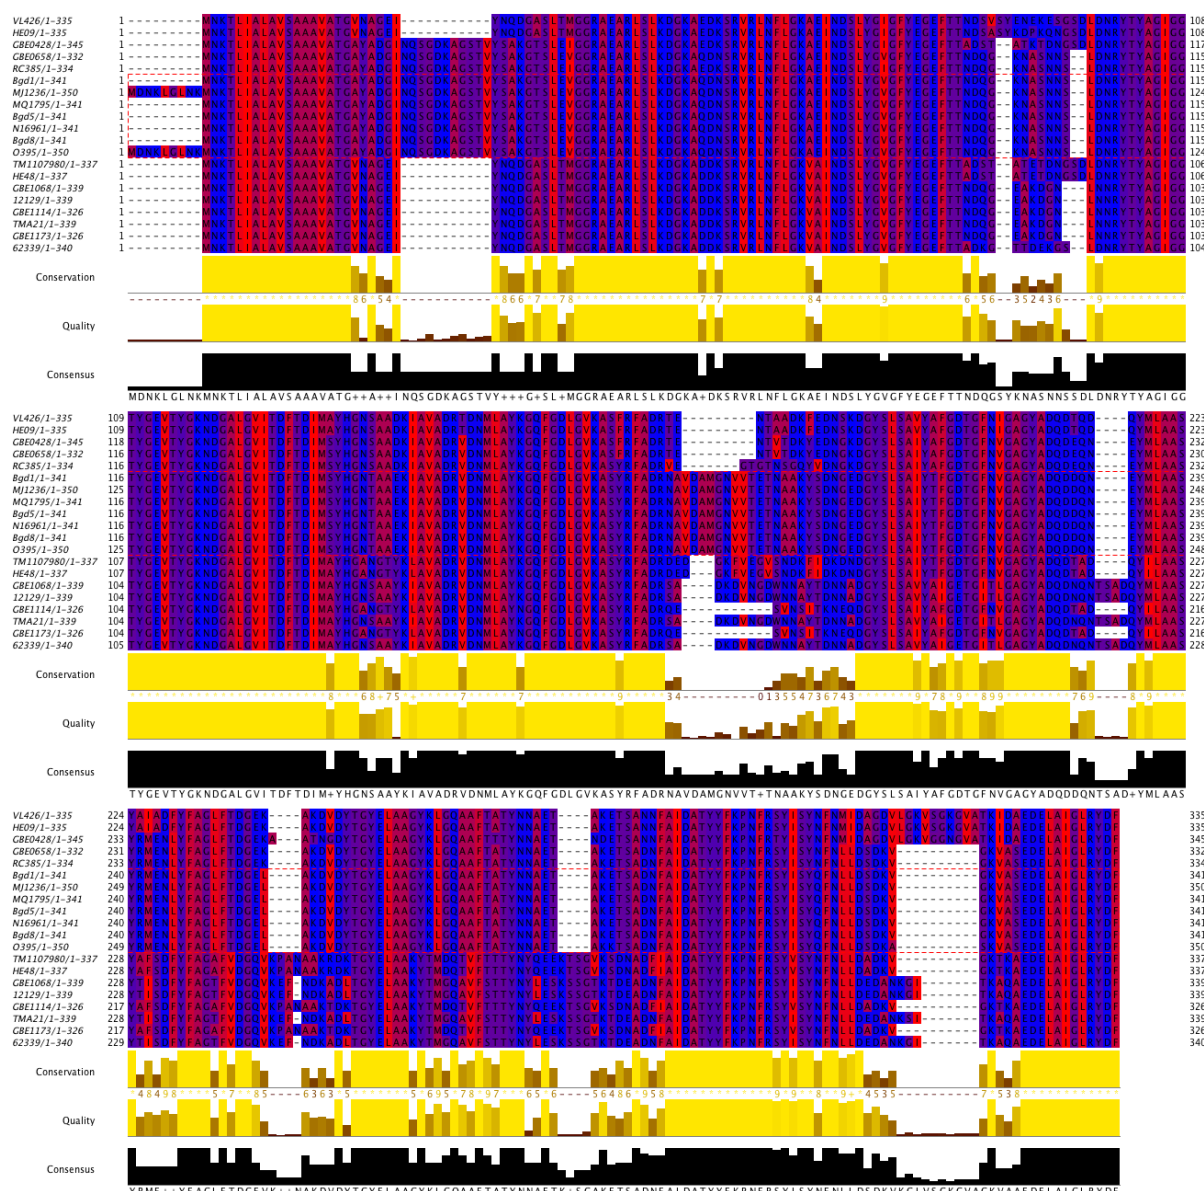

**Supplementary Figure 5. Alignment of *ompU* sequences.** The orthologous group containing *OmpU* was aligned with Muscle and visualized in Jalview. Amino acids are color-coded by hydrophobicity. The seven PG strains are shown in the dashed red box. Strain names are followed by the size of their *ompU* variant (in amino acids), following the dash character.

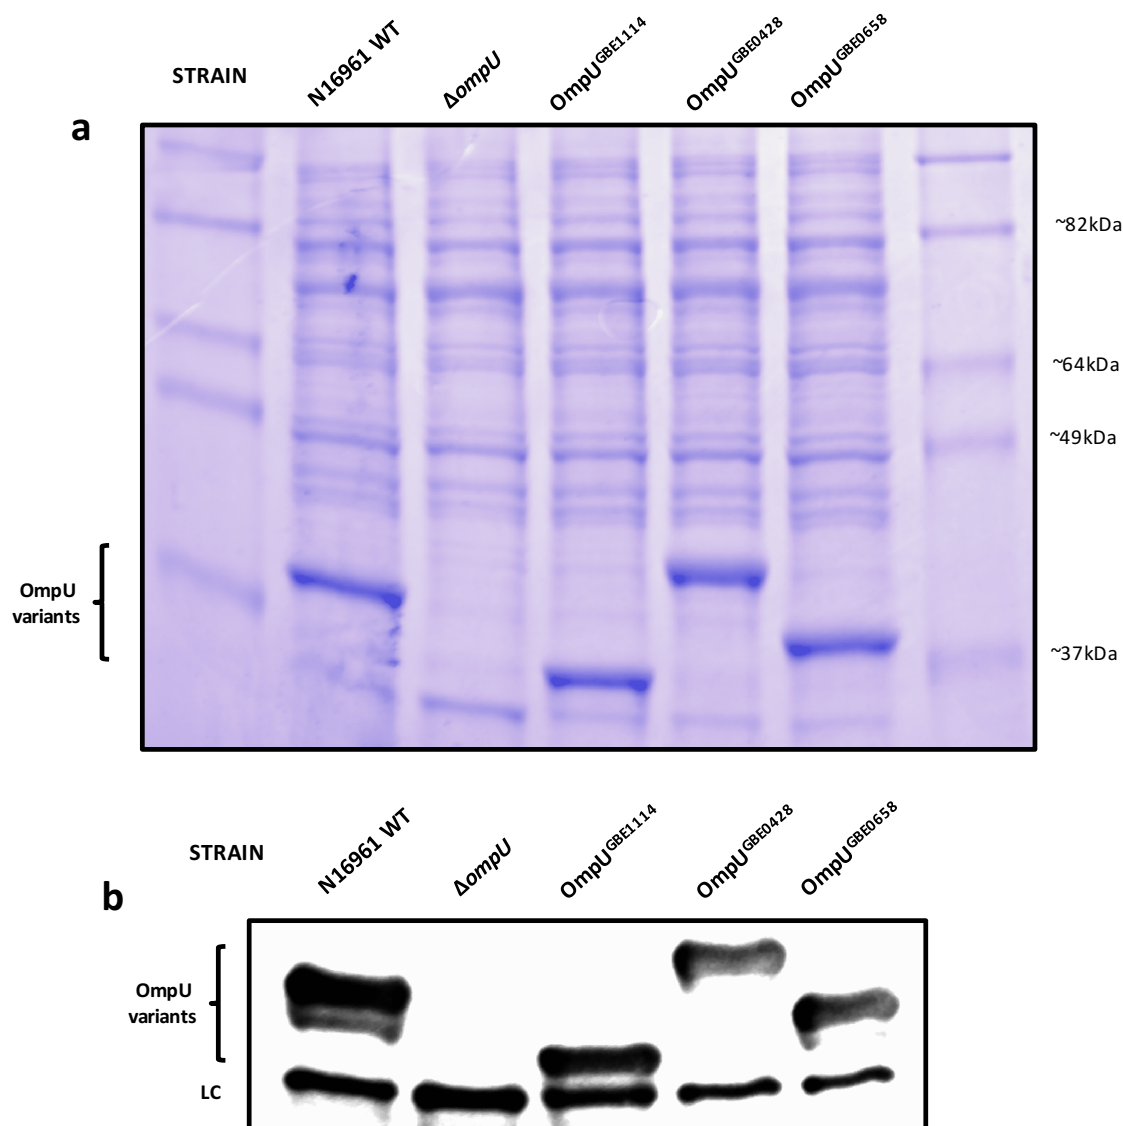

**Supplementary Figure 6. OmpU production in clinical strains of *V. cholerae* encoding environmental alleles of *ompU*.** Total protein lysates were run on a 16% Tris-glycine gel. **a**, gels were stained with Coomassie blue. WT, wild-type. **b**, gels were transferred to a nitrocellulose membrane. Protein samples were analyzed by immunoblotting with antibodies against OmpU. LC, loading control.

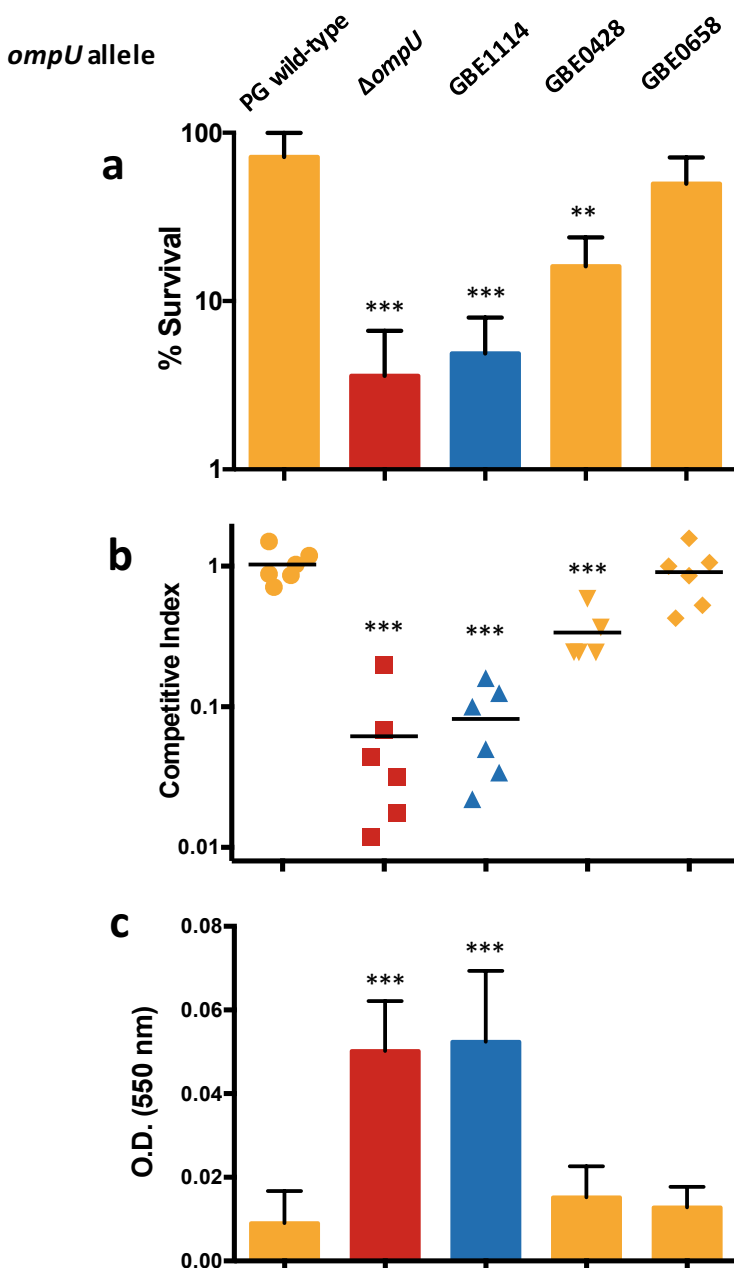

**Supplementary Figure 7. Phenotypic characterization of *ompU* alleles in classical (O395) background.** **a**, Survival of *ompU* mutants in the presence of bile (n=6). **b**, Colonization of the small intestine of *ompU* mutant strains (n≥5). **c**, Biofilm formation of *ompU* mutant strains on an abiotic surface (n=15). Yellow bars and symbols, PG-like allele; red bars and squares,  $\Delta ompU$ ; blue bars and triangles, EG-like allele. Center values represent the mean and error bars the standard deviation. Variance between the groups was similar. Statistical comparisons were made using student's *t*-test. \*\**P* < 0.01, \*\*\**P* < 0.001. Error bars represent standard deviation

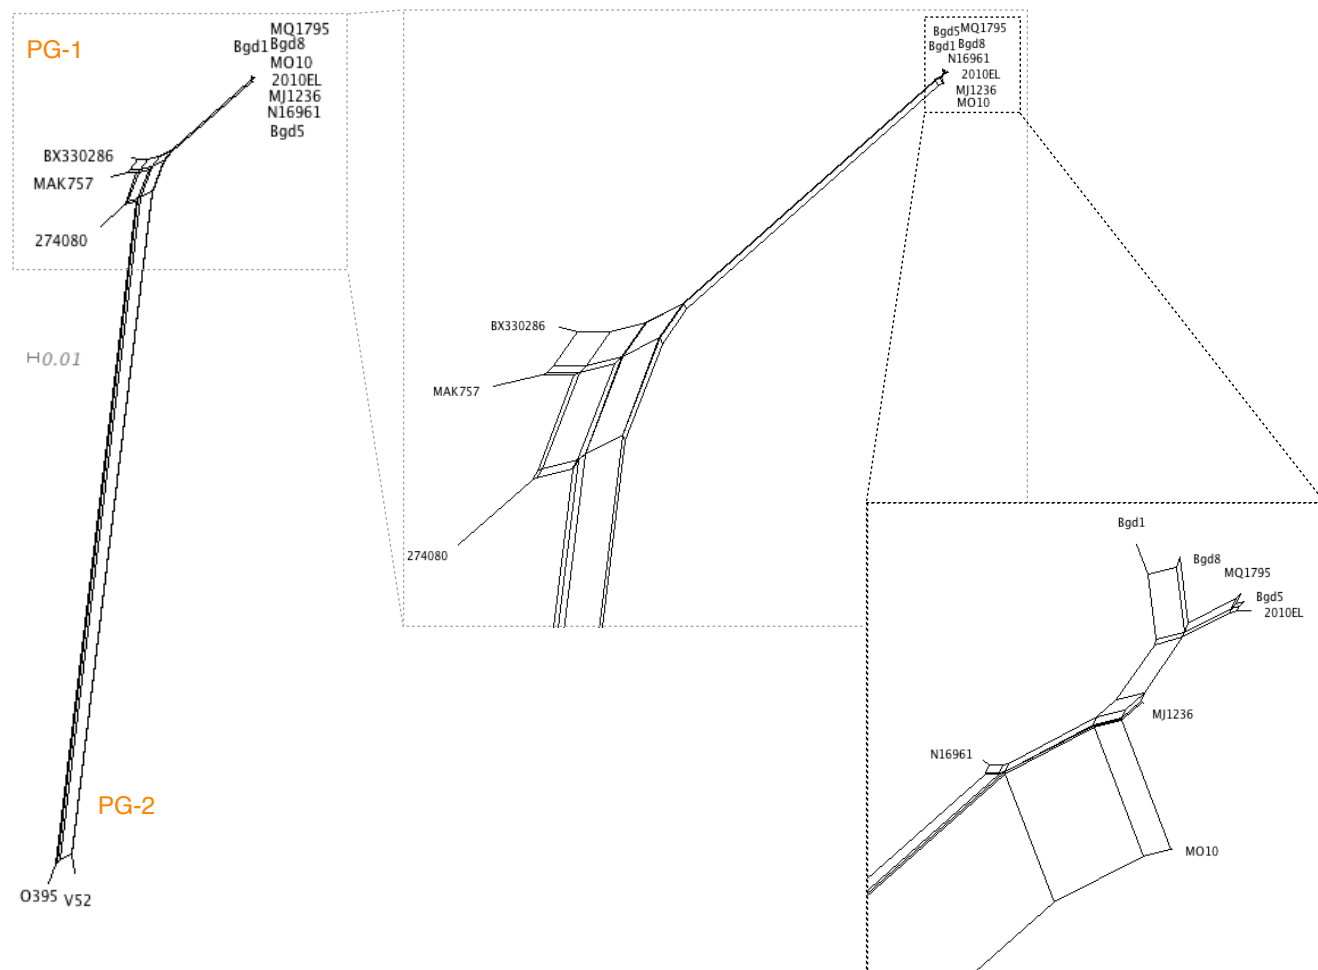

**Supplementary Figure 8. Splittree showing relationship of all PG *V. cholerae* genomes used in this study.** The neighbour-net is based on dimorphic sites in the alignment of all 13 PG genomes in the primary and replication datasets combined, excluding sites with gaps. Only alignment blocks (locally colinear blocks produced by mugsy) including all 13 genomes were included.

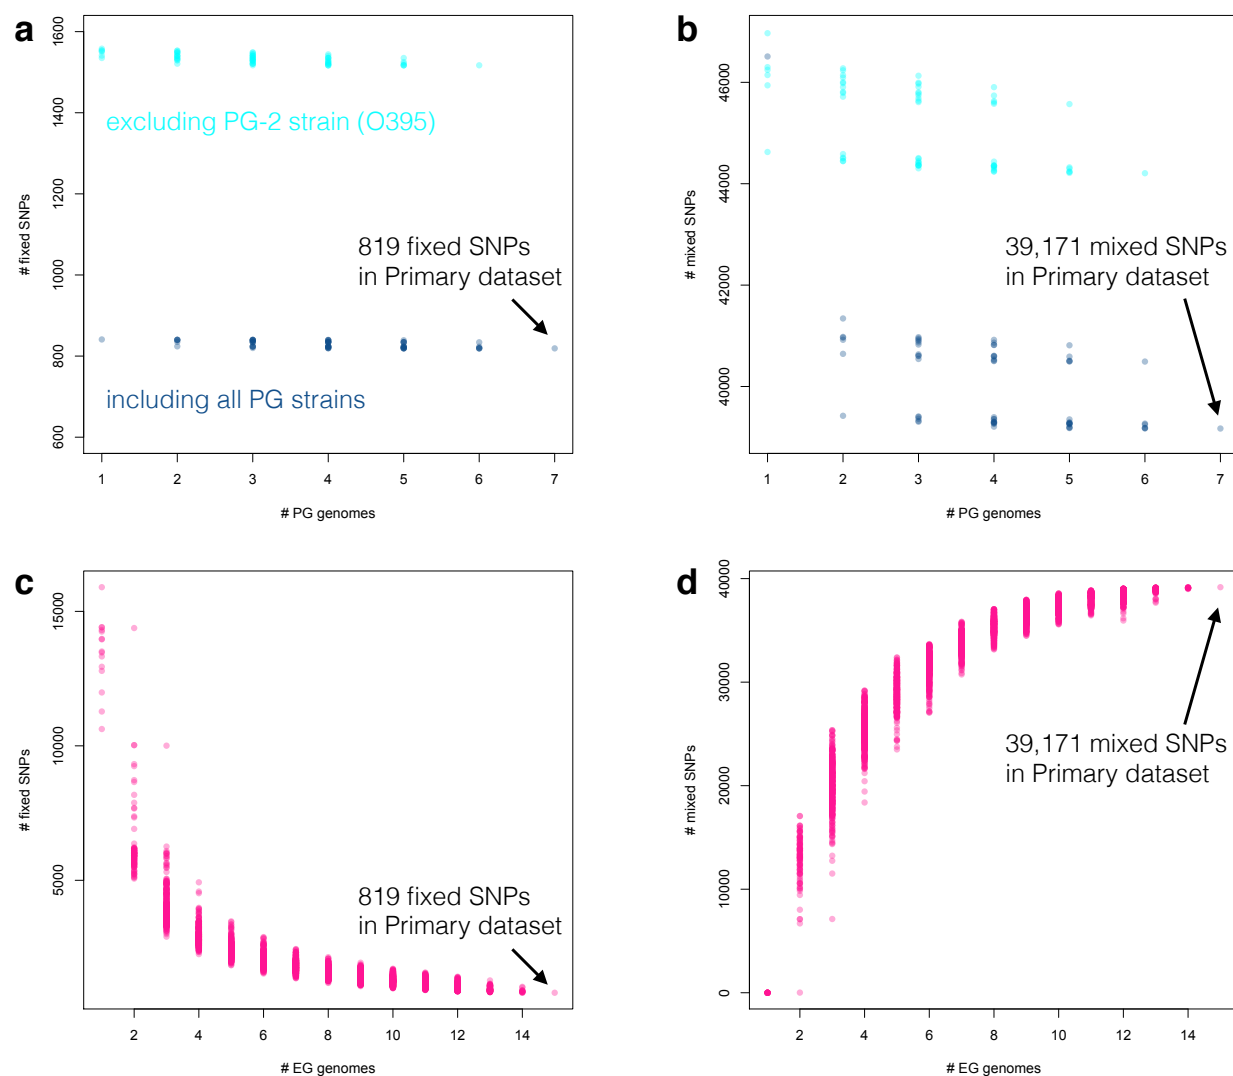

**Supplementary Figure 9. The number of identified fixed and mixed SNPs reach a plateau as additional genomes are sampled.** We repeated our pipeline to identify fixed (a, c) and mixed (b, d) SNPs as increasing numbers of PG genomes (a, b) or EG genomes (c, d) are sampled from the primary dataset. Each point represents a different combination of the 7 PGs or 15 EGs used in the study.

712

## 713 **Supplementary tables**

714 **Supplementary Table 1. *V. cholerae* genomes used in this study.**

715 **Primary dataset:**

| <b>Short name</b> | <b>PG/EG</b> | <b>Source</b>                        | <b>Accession number; source of strain</b> |
|-------------------|--------------|--------------------------------------|-------------------------------------------|
| Bgd1              | PG           | O1 Ogawa El Tor, Bangladesh clinical | This study; Son et al. <sup>60</sup>      |
| Bgd5              | PG           | O1 Inaba El Tor, Bangladesh clinical | This study; Son et al. <sup>60</sup>      |
| Bgd8              | PG           | O1 Ogawa El Tor, Bangladesh clinical | This study; Son et al. <sup>60</sup>      |
| N16961            | PG           | O1 Inaba El Tor, Bangladesh clinical | AE003852-3                                |
| MJ1236            | PG           | O1 Inaba El Tor, Bangladesh clinical | CP001485-6                                |
| MQ1795            | PG           | O1 Inaba El Tor, Bangladesh clinical | This study; Nair et al. <sup>61</sup>     |
| O395              | PG           | O1 Ogawa Classical, India clinical   | CP000626/CP000627                         |
| GBE0428           | EG           | non-O1, USA oyster                   | This study; Schuster et al. <sup>32</sup> |
| GBE0658           | EG           | non-O1, USA water                    | This study; Schuster et al. <sup>32</sup> |
| GBE1068           | EG           | non-O1, USA oyster                   | This study; Schuster et al. <sup>32</sup> |
| GBE1114           | EG           | non-O1, USA water                    | This study; Schuster et al. <sup>32</sup> |
| GBE1173           | EG           | non-O1, USA sediment                 | This study; Schuster et al. <sup>32</sup> |
| 12129             | EG           | O1 Inaba El Tor, Australia water     | ACFQ00000000                              |
| LMA38944          | EG           | O1, Brazil water                     | CP002555-6                                |
| CT536993          | EG           | unknown serogroup, Brazil sewage     | ADAL01000000                              |
| RC385             | EG           | O135, USA plankton                   | AAKH02000000                              |
| VL426             | EG           | non-O1/O139 Albensis, UK water       | ACHV00000000                              |

|           |    |                                |              |
|-----------|----|--------------------------------|--------------|
| HE09      | EG | unknown serogroup, Haiti water | AFOP01000000 |
| TM1107980 | EG | O1 Ogawa El Tor, Brazil sewage | ACHW00000000 |
| HE48      | EG | unknown serogroup, Haiti water | AFOR01000000 |
| TMA21     | EG | non-O1/O139, Brazil water      | ACHY00000000 |
| 62339     | EG | non-O1/O139, Bangladesh water  | AAWG00000000 |

716

717 **Replication dataset:**

| Short name | PG/EG | Source                               | Accession number;<br>source of strain |
|------------|-------|--------------------------------------|---------------------------------------|
| 2010EL     | PG    | Artibonite, Haiti clinical           | CP003069-70                           |
| 274080     | PG    | Gulf Coast, USA water                | AAUT00000000                          |
| BX330286   | PG    | Australia water                      | ACIA00000000                          |
| MAK757     | PG    | Sulawesi, Indonesia clinical         | AAUS00000000                          |
| MO10       | PG    | Madras, India clinical               | AAKF00000000                          |
| V52        | PG    | Sudan clinical                       | AAKJ00000000                          |
| MJ1236     | PG    | O1 Inaba El Tor, Bangladesh clinical | CP001485-6                            |
| 1587       | EG    | Lima, Peru clinical                  | AAUR00000000                          |
| AM19226    | EG    | Bangladesh clinical                  | AATY00000000                          |
| MZO3       | EG    | Bangladesh clinical                  | AAUU00000000                          |
| MZO2       | EG    | Bangladesh clinical                  | AAWF00000000                          |
| V51        | EG    | USA clinical                         | AAKI00000000                          |
| YB1A01     | EG    | Oyster pond, MA, USA water           | LBCL00000000                          |
| YB1G06     | EG    | Oyster pond, MA, USA water           | LBV00000000                           |
| YB2G01     | EG    | Oyster pond, MA, USA water           | LBFY00000000                          |
| YB3B05     | EG    | Oyster pond, MA, USA water           | LBGB00000000                          |
| YB4B03     | EG    | Oyster pond, MA, USA water           | LBGD00000000                          |

|        |    |                            |              |
|--------|----|----------------------------|--------------|
| YB4C07 | EG | Oyster pond, MA, USA water | LBGE00000000 |
| YB4G05 | EG | Oyster pond, MA, USA water | LBGG00000000 |
| YB4H02 | EG | Oyster pond, MA, USA water | LBGI00000000 |
| YB5A06 | EG | Oyster pond, MA, USA water | LBGJ00000000 |
| YB7A09 | EG | Oyster pond, MA, USA water | LBGM00000000 |

718



**Supplementary Table 2. Summary statistics of SNPs in both datasets.** fixN = fixed nonsynonymous SNPs; fixS = fixed synonymous SNPs; mixN = mixed nonsynonymous SNPs; mixS = mixed synonymous SNPs;  $dN$  = number of nonsynonymous SNPs per nonsynonymous site;  $dS$  = number of synonymous SNPs per synonymous site; sd = standard deviation.

|                                | Dataset |             |
|--------------------------------|---------|-------------|
|                                | Primary | Replication |
| total SNPs                     | 136,160 | 146,309     |
| total fixed                    | 819     | 2,772       |
| total mixed                    | 39,171  | 86,370      |
| total SNPs in genes            | 121,254 | 130,035     |
| total fixN in genes            | 210     | 597         |
| total fixS in genes            | 504     | 1,865       |
| total mixN in genes            | 6,982   | 14,418      |
| total mixS in genes            | 27,366  | 62,509      |
| proportion fixed SNPs in genes | 0.87    | 0.89        |
| proportion mixed SNPs in genes | 0.88    | 0.89        |
| mean mixed SNPs per gene       | 10.3    | 22.6        |
| median mixed SNPs per gene     | 3       | 12          |
| median mixN per gene           | 0       | 2           |
| sd mixN per gene               | 5.85    | 7.92        |
| median mixN + 2sd              | 11.70   | 17.85       |
| median mixN/mixS per gene      | 0.50    | 0.33        |
| sd mixN/mixS per gene          | 0.64    | 0.66        |
| median mixN/mixS + 2sd         | 1.78    | 1.65        |
| median fixN per gene           | 0       | 0           |
| sd fixN per gene               | 0.34    | 0.75        |
| median fixN + 2sd              | 0.68    | 1.50        |
| median fixN/fixS per gene      | 1       | 1           |
| sd fixN/fixS per gene          | 0.24    | 0.35        |
| median fixN/fixS + 2sd         | 1.48    | 1.70        |
| median $dN/dS$ per gene        | 0.17    | 0.12        |
| sd $dN/dS$ per gene            | 0.22    | 0.22        |
| median $dN/dS$ + 2sd           | 0.60    | 0.56        |

**Supplementary Table 3. Gene families present in all seven phylocore genomes (PGs) and absent in all 15 environmental genomes (EGs) in the primary dataset.**

| Locus            | Gene ID | Annotation                                        | Presence in replication dataset |
|------------------|---------|---------------------------------------------------|---------------------------------|
| <b>1</b>         | VCA0790 | Possible integrase (RefSeq)                       | Present in all 7 PGs + 2 EGs    |
|                  | VCA0793 | Phage regulatory protein, Rha-like (IPR019104)    | Not assigned to gene family     |
|                  | VCA0795 | Site-specific recombinase PinR (COG1961)          | Not assigned to gene family     |
| <b>2</b>         | VCA1042 | Integral membrane protein CcmA (COG1664)          | Present in all 7 PGs + 1 EG     |
|                  | VCA1043 | tagE protein (RefSeq)                             | Not assigned to gene family     |
| <b>3 (CTX)</b>   | VC1462  | CTX phage RstB (IPR010008)                        | Present in 6 PGs + 2 EGs        |
| <b>4 (VPI-1)</b> | VC0824  | Peroxiredoxin Tpx (COG2077)                       | Present in all 7 PGs + 1 EG     |
|                  | VC0831  | Toxin-coregulated pilus biosynthesis protein TcpC | Present in all 7 PGs + 4 EGs    |
|                  | VC0835  | Toxin-coregulated pilus biosynthesis protein T    | Present in all 7 PGs + 3 EGs    |
|                  | VC0836  | Toxin-coregulated pilus biosynthesis protein E    | Present in all 7 PGs + 4 EGs    |
|                  | VC0838  | TCP virulence regulatory protein TcpN             | Present in all 7 PGs + 4 EGs    |
| <b>5 (VSP-2)</b> | VCA0483 | Hypothetical protein (RefSeq)                     | Not assigned to gene family     |

Gene IDs are from the *V. cholerae* O1 biovar El Tor N16961 reference genome. Gene order and annotations are nearly identical in *V. cholerae* MJ-1236. The 5 loci are defined as clusters of adjacent or nearly adjacent genes (0-6 genes apart in either reference genome)

# **Supplementary Table 4. Genome-wide McDonald-Kreitman test between PGs and EGs.**

Primary dataset:

| Polymorphism from: | FN  | FS  | FN/FS | PN   | PS    | PN/PS | Obs. FI | Exp. FI | <i>P</i> (obs > exp) |
|--------------------|-----|-----|-------|------|-------|-------|---------|---------|----------------------|
| PG                 | 210 | 504 | 0.42  | 1022 | 4433  | 0.23  | 1.81    | 1.76    | 0.12                 |
| EG                 |     |     |       | 6982 | 27366 | 0.26  | 1.63    | 1.06    | <0.001               |

Replication dataset:

| Polymorphism from: | FN  | FS   | FN/FS | PN    | PS    | PN/PS | Obs. FI | Exp. FI | <i>P</i> (obs > exp) |
|--------------------|-----|------|-------|-------|-------|-------|---------|---------|----------------------|
| PG                 | 597 | 1865 | 0.32  | 2694  | 14342 | 0.19  | 1.70    | 1.67    | 0.068                |
| EG                 |     |      |       | 14418 | 62509 | 0.23  | 1.39    | 0.98    | <0.001               |

Total genomewide counts of classes of mutations: FN = fixed nonsynonymous, FS = fixed synonymous, PN = polymorphic nonsynonymous, PS = polymorphic synonymous. Fixed indicates that one allele is present in all PGs and a different allele in all EGs. Fixation Index (FI) = (FN/FS)/(PN/PS). *P*(obs > exp) is the *P*-value computed from permutations as the fraction of permutations in which the FI was greater than observed in the observed data.

**Supplementary Table 5. Characteristics of three additional predicted VAPs with an excess of nonsynonymous mixed SNPs in the replication dataset.**

| Gene ID (VCD #) | Annotation                        | Gene length (bp) | Total # SNPs | Mixed $dN$    | Mixed $dS$    | Mixed $dN/dS$ | Mixed NS | Mixed S | $P$              |
|-----------------|-----------------------------------|------------------|--------------|---------------|---------------|---------------|----------|---------|------------------|
| 1 001506        | hypothetical                      | 331              | 21 (7)       | 0.122 (0)     | 0.034 (0)     | 3.58 (n.a.)   | 20 (0)   | 1 (0)   | 4.11e-9 (n.s.)   |
| 2 003509        | hypothetical; possible pseudogene | 684              | 77 (35)      | 0.063 (0.010) | 0.110 (0.006) | 0.57 (1.70)   | 31 (4)   | 18 (0)  | 1.74e-5 (0.0625) |
| 3 000213        | hypothetical                      | 3261             | 149 (118)    | 0.008 (0.022) | 0.010 (0.080) | 0.83 (0.28)   | 19 (54)  | 7 (64)  | 3.99e-5 (n.s.)   |

NS=nonsynonymous; S=synonymous.  $dN$  = number of nonsynonymous SNPs per nonsynonymous site;  $dS$  = number of synonymous SNPs per synonymous site. The genes listed have mixed NS, mixed NS:S, and mixed  $dN/dS$  each over two standard deviations above their respective genome-wide medians in the replication dataset. A one-sided binomial test determined if the mixed NS:S ratio was greater than the expected genome-wide median value of 0.33 per gene. Numbers in parentheses are for the primary dataset, with an expected genome-wide median mixed N:S of 0.5.  $P$ -values greater than 0.1 are denoted as not significant (n.s.).

**Supplementary Table 6. Amino acid differences between ompU alleles used in this study.**

Single amino acid substitutions are shown above the diagonal; the number of indels and their total sizes are shown below. Differences are based on the ompU protein alignment (Supplementary Figure 5). All PG1 genomes have identical ompU protein sequences.

|                | <b>PG1</b>         | <b>GBE0658</b>     | <b>GBE0428</b>     | <b>GBE1114</b> |
|----------------|--------------------|--------------------|--------------------|----------------|
| <b>PG1</b>     | 0                  | 15aa               | 45aa               | 80aa           |
| <b>GBE0658</b> | 1 indel<br>(9aa)   | 0                  | 30aa               | 78aa           |
| <b>GBE0428</b> | 4 indels<br>(22aa) | 3 indels<br>(13aa) | 0                  | 86aa           |
| <b>GBE1114</b> | 5 indels<br>(31aa) | 5 indels<br>(22aa) | 6 indels<br>(33aa) | 0              |

**Supplementary Table 7. Genome assembly statistics.** The mean number of contigs and N50 are shown, broken down by dataset, and within dataset by PGs (7 genomes) and EGs (15 genomes). Median values are shown in parentheses.

| Dataset     | # contigs   | N50                 |
|-------------|-------------|---------------------|
| Primary     |             |                     |
| PGs         | 39.2 (53)   | 1,431,696 (246,647) |
| EGs         | 90.9 (58)   | 648,274 (255,577)   |
| Total       | 74.5 (55.5) | 897,545 (251,112)   |
| Replication |             |                     |
| PGs         | 45.7 (43)   | 1,144,254 (227,382) |
| EGs         | 66.6 (57)   | 294,710 (285,424)   |
| Total       | 60.0 (56.5) | 565,019 (285,397)   |

**Supplementary Table 8. Genome-wide alignment statistics.** The number and total length of locally colinear blocks are reported for mugsy alignments of the primary dataset, the replication dataset, and an alignment of all 13 PG genomes from both datasets. The N50 was calculated based on the mean size of each LCB, because LCBs can contain gaps. Core LCBs were defined as those containing a sequence from each of the genomes in the dataset.

| Dataset                  | # LCBs | Total LCBs length (bp) [pangenome] | Total LCBs N50 (bp) | # core LCBs | Core LCBs length (bp) | Core LCBs N50 (bp) |
|--------------------------|--------|------------------------------------|---------------------|-------------|-----------------------|--------------------|
| Primary (22 genomes)     | 11,015 | 6,952,342                          | 5,900               | 627         | 3,302,728             | 8,566              |
| Replication (22 genomes) | 8,742  | 6,819,882                          | 13,638              | 264         | 3,572,057             | 26,306             |
| All PGs (13 genomes)     | 4,336  | 4,598,913                          | 33,850              | 209         | 3,755,985             | 38,635             |
